# Supplementary material for: Sarcopenia as an important determinant for adverse outcomes in patients with pyogenic liver abscess
Source: PeerJ. 2023 Oct 4;11:e16055. doi: 10.7717/peerj.16055 (PMC10559880; doi:10.7717/peerj.16055)
Supplement: Supplemental Information 4 — Blood pressure highlighted in green, serious complications highlighted in blue, and measurement indicators related to muscle mass highlighted in gray. [file peerj-11-16055-s004.xlsx]

## Sheet: Sheet1
Sex(man1; woman 0)	Age(years old)	Height(m)	Weight(Kg)	Date of admission	Discharge date	Hospitalization days	vital signs	T(℃)	Heart rate (beats/minute)	Pulse rate (times/minute)	Respiratory rate (times/minute)	SBP	DBP	Duration of illness(days)	Onset symptom（Yes1 No0）	diarrhea	Abdominal pain and distension	Nausea and vomiting	palpitation	Chest pain and tightness	Cough and sputum	Fatigue, muscle aches	Disturbance of consciousness	Headache and dizziness	Dyspnea	Diabetes（1Preexisting 2Newfound）		DKA	ketosis	Past medical history（Yes 1，No 0）	HBP	Diabetes	Pre-admission diabetes treatment regimen (untreated 0 insulin only 1 medication only 2 insulin + medication 3)	Heart disease (1, not 0)	Respiratory diseases (1, not 0)	Urinary system diseases (1, not 0)	Hepatobiliary system (fatty liver 1, hepatitis B 2, schistosoma 3, cholecystitis 4, cirrhosis 5, hepatocellular carcinoma 6, calculi 7, history of hepatobiliary system surgery 8, liver abscess 9, others 10)	Gastrointestinal disease (1, not 0)	Hematological diseases (1, not 0)	Serious complications	Heart failure	Myocardial infarction	Pulmonary edema	ARDS	Pulmonary infection	Pleural effusion	shock	CRRT	Arrhythmia
1	49	1.81	85	2016-02-14	2016-03-07	22		36.6	90	90	18	110	75	3		0	0	1	0	0	1	1	0	1	0	0		0	0		0	0	0	0	1	0	0	0	0	1	0	0	0	0	1	1	0	0
1	33	1.76	73.5	2014-05-27	2014-06-02	6		39.6	120	120	23	140	82	10		0	0	0	0	0	0	0	0	0	0	0		0	0		0	0	0	0	0	0	0	0	0	0	0	0	0	0	0	0	0	0
1	55	1.78	-	2013-10-31	2013-12-17	47		36.4	108	108	18	160	93	10		0	1	0	0	0	0	0	0	0	0	0		0	0		0	0	0	0	0	0	0	0	0	1	0	0	0	0	1	1	0	0
1	49	1.82	-	2015-10-18	2015-10-26	8		37.6	120	120	30	158	80	15		0	1	0	0	0	0	0	0	0	0	1		0	1		0	1	0	0	0	0	0	0	0	1	0	0	0	0	1	1	0	0	1
1	26	1.76	-	2015-09-26	2015-10-27	31		37	114	114	20	116	73	4		0	0	0	0	0	0	0	0	0	0	2		0	1		0	0	0	0	0	0	0	0	0	0	0	0	0	0	0	1	0	0
1	37	1.72	80	2014-10-17	2014-11-01	15		36.8	86	86	20	131	84	3		0	1	1	0	0	0	0	0	0	0	0		0	0		0	0	0	0	0	0	0	0	0	1	0	0	0	0	0	0	0	0
1	32	1.76	-	2015-10-22	2015-11-09	18		38.5	80	80	18	137	87	7		0	0	0	0	0	0	0	0	0	0	0		0	0		0	0	0	0	0	0	0	0	0	1	0	0	0	0	0	0	0	0
1	62	1.77	75	2012-03-07	2012-03-19	12		36.7	94	94	20	153	94	7		0	1	0	0	0	0	0	0	0	0	0		0	0		0	0	0	1	0	0	0	0	0	0	0	0	0	0	0	0	0	0
1	51	1.76	87	2016-07-13	2016-07-22	9		36.6	98	98	22	132	101	30		0	1	0	0	0	0	0	0	0	0	0		0	0		0	0	0	0	0	0	0	0	0	1	0	0	0	0	1	1	0	0
1	38	1.76	86	2017-12-22	2018-01-15	24		36.8	96	96	20	128	82	40		0	0	0	0	0	1	1	0	0	0	2		0	0		0	0	0	0	0	0	0	0	0	0	0	0	0	0	0	1	0	0
1	45	1.73	65	2017-11-17	2017-12-10	23		36.9	86	86	20	134	77	7		0	1	0	0	0	0	0	0	0	0	0		0	0		0	0	0	0	0	0	0	0	0	1	0	0	0	0	1	1	0	0
1	69	1.83	73	42039	42063	24		37.7	86	86	20	144	97	15		0	1	0	0	0	0	0	0	0	0	0		0	0		1	0	0	0	0	0	8	0	0	1	0	0	0	0	0	0	0	0	1
1	59	1.72	90	2016-08-22	2016-09-16	25		36.8	82	82	20	98	64	10		0	0	0	0	0	0	1	0	1	0	0		0	0		0	0	0	0	0	0	0	0	0	1	0	0	0	0	0	1	0	0
1	49	1.69	74	2018-03-15	2018-04-02	18		36.3	90	90	24	122	80	10		0	0	0	0	0	0	0	0	0	0	0		0	0		0	0	0	0	0	0	0	0	0	1	0	0	0	0	0	1	0	0
1	52	1.76	76	2014-06-17	2014-07-03	16		36.6	76	76	20	144	95	30		1	1	0	0	0	0	1	0	0	0	0		0	0		0	0	0	0	0	1	7	0	0	0	0	0	0	0	0	0	0	0	0
1	52	1.73	85	2015-01-01	2015-01-23	22		38.8	84	84	20	155	83	5		0	1	0	0	0	0	0	0	0	0	0		0	0		1	0	0	0	0	0	0	0	0	0	0	0	0	0	0	0	0	0
1	67	1.75	90	2016-10-26	2016-11-04	9		36.3	74	74	20	124	78	1095		0	0	0	0	0	0	0	0	0	0	0		0	0		1	0	0	0	0	0	8	0	0	0	0	0	0	0	0	0	0	0
1	47	1.78	79	2016-09-12	2016-09-30	18		38.6	96	96	20	121	87	5		0	0	0	0	0	0	1	0	0	0	0		0	0		0	0	0	0	0	0	0	0	0	0	0	0	0	0	0	1	0	0
1	51	1.82	-	42269	42296	27		37.2	118	118	39	113	78	4		0	0	0	0	0	0	1	1	1	0	0		0	0		0	0	0	0	0	0	0	0	0	1	1	1	1	1	1	1	1	1
1	50	1.74	68	2014-03-31	2014-04-16	16		37.4	102	102	20	121	88	10		0	1	1	0	1	1	1	0	0	0	0		0	0		0	0	0	0	0	0	0	0	0	0	0	0	0	0	0	0	0	0
1	65	1.7	87	2018-01-02	2018-01-26	24		36.9	78	78	18	129	81	14		0	0	0	0	0	0	0	0	0	0	1		0	1		1	1	1	0	0	0	8	0	0	0	0	0	0	0	0	1	0	0	0
1	38	1.73	58	2015-06-11	2015-07-03	22		37	102	102	20	110	75	90		0	0	0	0	0	0	1	0	0	0	2		0	1		0	0	0	0	0	0	0	0	0	0	0	0	0	0	0	0	0	0
1	46	1.69	60	2016-11-24	2016-11-30	6		37.1	84	84	19	129	96	20		0	0	0	0	0	1	1	0	0	0	2		0	0		0	0	0	0	0	0	0	1	0	0	0	0	0	0	0	0	0	0
1	64	1.78	-	2016-08-04	2016-09-07	34		36.5	78	78	22	99	50	2		0	0	0	0	0	0	1	1	1	0	0		0	0		0	0	0	0	0	0	0	1	0	1	0	0	0	0	0	1	0	0
1	56	1.65	76	2016-06-24	2016-07-06	12		36.6	88	88	20	158	85	7		0	0	0	0	0	0	0	0	0	0	0		0	0		0	0	0	0	0	0	0	0	0	0	0	0	0	0	0	0	0	0
1	46	1.75	76	41982	42019	37		36.3	78	78	20	103	78	15		1	1	0	0	0	0	0	0	0	0	1		0	0		0	1	1	0	0	0	0	0	0	1	0	0	0	0	0	0	0	0
1	58	1.73	70	2016-12-27	2017-01-12	16		36.5	70	70	18	106	67	7		0	0	0	0	0	0	0	0	0	0	0		0	0		0	0	0	0	0	0	0	0	0	1	0	0	0	0	0	0	0	0
1	39	1.68	68	2017-10-10	2017-10-21	11		36.9	82	82	20	114	72	90		0	1	0	0	0	0	0	0	0	0	0		0	0		0	0	0	0	0	0	0	0	0	0	0	0	0	0	0	0	0	0
1	54	1.64	75	2016-07-07	2016-07-21	14		36.9	88	88	20	128	83	10		0	0	0	0	0	0	1	0	1	0	0		0	0		0	0	0	0	0	0	0	0	0	0	0	0	0	0	0	0	0	0
1	53	1.72	91	2015-02-08	2015-02-16	8		39.2	84	84	20	160	90	15		0	1	0	0	0	0	0	0	0	0	0		0	0		0	0	0	0	0	0	0	0	0	1	0	0	0	0	1	1	0	0
1	42	1.7	70	2016-03-02	2016-03-11	9		36.7	82	82	22	114	72	5		0	0	0	0	0	0	1	0	0	0	0		0	0		0	0	0	0	0	0	2	0	0	1	0	0	0	0	1	0	0	0
1	67	1.67	79	2015-06-10	2015-07-14	34		37.8	100	100	19	123	85	30		0	0	0	0	0	0	0	0	0	0	1		0	1		0	1	2	0	0	0	0	0	0	1	0	0	0	0	0	0	0	0	0
1	60	1.73	72	42905	42926	21		37	96	96	20	187	91	15		1	1	0	0	0	0	1	0	0	0	0		0	0		1	0	0	0	0	0	0	0	0	1	0	0	0	0	1	1	0	0
1	50	1.72	55	41956	41976	20		36.5	76	76	20	130	97	4		1	1	0	0	0	0	1	0	0	0	0		0	0		0	0	0	0	0	0	0	0	0	1	0	0	0	0	0	1	0	0
1	48	1.67	58	2017-08-14	2017-09-18	35		36.7	92	92	20	105	66	30		0	1	1	0	0	1	1	0	0	0	1		0	0		0	1	0	0	0	0	0	0	0	1	0	0	0	0	0	0	0	0
1	57	1.7	78	2013-12-09	2014-01-16	38		36.4	90	90	20	102	71	15		0	1	0	0	0	0	1	0	1	0	0		0	0		0	0	0	0	0	0	2	0	1	1	0	0	0	0	0	0	0	0	1
1	48	1.6	74	2014-06-03	2014-06-18	15		36.9	78	78	20	127	76	150		0	0	0	0	0	0	0	0	0	0	0		0	0		0	0	0	0	0	0	0	0	0	0	0	0	0	0	0	0	0	0
1	69	1.73	73.5	2016-04-25	2016-05-11	16		36.5	76	76	20	88	66	10		0	0	0	0	1	0	0	0	0	0	0		0	0		0	0	0	0	0	0	0	0	0	1	0	0	0	0	0	0	0	0
1	59	1.67	-	2015-07-16	2015-08-07	22		37.6	92	92	21	130	84	30		1	1	0	0	0	0	0	0	0	0	0		0	0		0	0	0	0	0	0	0	0	0	0	0	0	0	0	0	0	0	0	0
1	52	1.72	72	2015-02-17	2015-03-17	28		38.6	100	100	20	112	77	10		0	0	0	0	0	0	1	0	1	0	0		0	0		0	0	0	0	0	0	0	0	0	1	0	0	0	0	1	1	0	0
1	41	1.74	59	42496	42508	12		36.2	106	106	20	96	65	3		0	1	0	0	0	0	0	0	0	0	0		0	0		0	0	0	0	0	0	8	0	0	1	0	0	0	0	0	0	0	0	0
1	61	1.65	67	2016-02-17	2016-03-01	13		36.3	86	86	20	146	91	60		0	1	0	0	0	0	0	0	0	0	0		0	0		0	0	0	0	0	0	8	0	0	0	0	0	0	0	0	0	0	0
1	43	1.7	74	2014-11-07	2014-11-15	8		36	84	84	20	121	67	7		0	0	0	0	0	0	0	0	0	0	0		0	0		0	0	0	0	0	0	0		0	0	0	0	0	0	0	1	0	0
1	38	1.62	59	2014-03-27	2014-04-03	7		36.9	116	116	20	120	98	15		1	1	1	0	0	1	1	0	0	0	0		0	0		0	0	0	0	0	0	0	0	0	0	0	0	0	0	0	0	0	0
1	50	1.72	72	2014-03-22	2014-04-08	17		38.2	94	94	20	118	67	21		0	0	0	0	0	0	1	0	0	0	2		0	0		0	0	0	0	0	0	0	0	0	1	0	0	0	0	0	1	0	0
1	50	1.81	-	42786	42822	36		38.7	90	90	20	130	82	1		0	0	0	0	0	0	0	0	0	0	0		0	0		0	0	0	0	0	0	6,8	0	0	1	1	0	0	0	1	1	1	0	1
1	55	1.68	78	2014-07-04	2014-08-02	29		38.8	106	106	20	112	77	12		0	0	1	0	0	0	0	0	0	0	2		0	0		0	0	0	0	0	0	0	0	0	1	0	0	0	0	1	1	0	0	1
1	48	1.8	71	42748	42758	10		36.5	80	80	20	130	80	15		0	1	0	0	0	0	1	0	0	0	2		0	0		0	0	0	0	0	0	0	0	0	1	0	0	1	0	0	1	0	0	1
1	72	1.65	72	2018-01-05	2018-01-26	21		36.5	98	98	18	103	82	2		0	0	0	0	0	1	1	0	0	0	0		0	0		1	0	0	0	0	0	0	0	0	1	0	0	0	0	1	0	0	0	1
1	50	1.78	76	2017-10-09	2017-10-26	17		36.4	76	76	20	103	84	5		0	1	0	0	0	0	0	0	0	0	0		0	0		1	0	0	0	0	0	2	0	0	1	0	0	0	0	0	0	0	0
1	58	1.8	55	2018-01-29	2018-02-13	15		38.7	96	96	22	133	83	10		0	1	0	0	0	0	1	0	0	0	0		0	0		0	0	0	0	0	0	0	1	0	1	1	0	0	0	1	1	0	0	1
1	37	1.74	57	41928	41964	36		36.6	78	78	20	119	79	30		0	1	0	0	0	0	1	0	0	0	1		0	0		0	1	1	0	0	0	2	0	0	0	0	0	0	0	0	1	0	0
1	60	1.74	75	2017-05-09	2017-06-09	31		36.3	80	80	20	135	95	4		0	0	0	0	0	0	1	0	0	0	2		0	0		1	0	0	1	0	0	4	0	0	1	0	0	0	0	1	0	0	0
1	74	1.68	-	2015-04-01	2015-04-15	14		38.5	122	122	23	169	98	5		0	1	1	0	1	0	1	0	0	0	2		0	1		1	0	0	1	0	0	0	0	0	1	0	0	0	0	0	0	0	0
1	70	1.63	49	2017-11-03	2017-11-16	13		36.3	108	108	20	104	92	3		0	0	0	0	0	0	0	0	0	0	0		0	0		0	0	0	0	1	0	0	0	0	1	0	0	0	0	1	1	0	0	1
1	50	1.74	71	2015-11-09	2015-11-14	5		38	76	76	20	133	72	10		0	1	0	0	0	0	0	0	0	0	2		0	1		0	0	0	0	0	0	0	0	0	1	0	0	0	0	0	0	0	0	1
1	57	1.74	-	2015-11-30	2015-12-21	21		36.1	72	72	20	134	85	15		0	1	1	1	1	1	1	0	1	0	1		0	0		1	1	0	0	0	1	10	1	0	1	0	0	0	0	0	0	0	0	0
1	29	1.72	70	2016-04-23	2016-05-11	18		36.1	102	102	20	112	74	30		0	1	1	1	0	0	1	0	1	0	2		0	0		0	0	0	0	0	0	0	1	0	1	0	0	0	0	0	1	0	0	0
1	53	1.73	54	42268	42293	25		38.8	102	102	20	156	75	10		0	0	0	0	0	0	1	0	0	0	1		0	1		1	1	2	0	0	0	0	0	0	1	0	0	0	0	0	0	0	0
0	59	1.64	-	2018-01-01	2018-01-11	10		36.3	104	104	30	147	95	15		0	1	1	1	0	0	1	0	0	0	0		0	0		0	0	0	0	0	0	2,8	0	0	1	0	0	0	0	1	1	0	0	0
1	34	1.75	69	2015-10-23	2015-10-28	5		36.5	74	74	20	101	66	10		0	0	0	0	0	0	0	0	0	0	0		0	0		0	0	0	0	0	0	2	0	0	0	0	0	0	0	0	1	0	0
1	53	1.75	68	2017-05-17	2017-06-01	15		36.3	72	72	20	114	76	15		0	0	0	0	0	0	1	0	1	0	0		0	0		0	0	0	0	0	0	0	0	0	0	0	0	0	0	0	0	0	0
1	67	1.68	80	41918	41934	16		38.9	96	96	20	129	79	90		0	0	0	0	0	0	0	0	0	0	0		0	0		0	0	0	0	0	0	0	0	0	1	0	0	0	0	0	1	0	0
1	53	1.61	70	2017-05-18	2017-06-12	25		37.2	70	70	20	129	88	7		0	0	0	1	0	0	0	0	0	0	0		0	0		0	0	0	0	0	0	0	0	0	1	0	0	0	0	0	1	0	0	1
1	54	1.61	60	2017-06-01	2017-06-08	7		37	70	70	20	134	87	4		0	0	0	0	0	0	0	0	0	0	0		0	0		0	0	0	0	0	0	0	0	0	0	0	0	0	0	0	0	0	0
1	75	1.66	-	2015-12-19	2016-01-14	26		37.8	82	82	20	145	73	10		0	1	0	0	0	0	1	0	0	0	0		0	0		0	0	0	0	0	0	0	0	0	1	0	0	0	0	1	1	0	0	0
1	53	1.6	57	2017-09-25	2017-10-10	15		36.2	82	82	20	86	50	20		0	0	0	0	0	0	1	0	0	0	0		0	0		0	0	0	0	0	0	0	1	0	0	0	0	0	0	0	0	0	0
1	61	1.63	75	2015-03-30	2015-04-11	12		36.5	82	82	20	112	68	5		0	0	0	0	0	0	0	0	0	0	0		0	0		0	0	0	0	0	0	0	0	0	1	0	0	0	0	0	1	0	0
1	66	1.72	80	2018-03-09	2018-03-23	14		38.3	112	112	20	114	69	14		0	0	0	0	0	0	0	0	0	0	1		0	1		1	1	0	0	0	0	3	0	0	1	1	0	0	0	0	1	0	0
1	69	1.75	-	42909	42923	14		38.7	100	100	18	116	68	30		0	1	0	0	0	0	0	0	1	0	0		0	0		0	0	0	0	0	0	0	0	0	1	0	0	0	0	0	0	0	0
1	65	1.73	70	2016-03-31	2016-05-03	33		36.5	112	112	20	90	71	3		0	1	1	0	0	0	1	0	0	0	0		0	0		0	0	0	0	0	0	8	1	0	1	0	0	0	0	0	1	0	0
1	56	1.62	66	2017-09-12	2017-09-21	9		36.4	68	68	20	154	92	30		0	1	0	0	0	0	0	0	0	0	0		0	0		0	0	0	0	0	0	0	0	0	0	0	0	0	0	0	1	0	0
1	59	1.64	69	2014-12-28	2015-01-16	19		39	128	128	26	107	63	15		0	0	1	1	0	1	1	0	0	0	0		0	0		0	0	0	0	0	0	7	0	0	1	0	0	0	0	1	1	0	0	0
1	64	1.75		2014-03-07	2014-03-31	24		38.1	78	78	20	104	87	5		0	1	0	1	0	0	1	1	0	0	1		0	0		1	1	1	0	0	0	8	0	0	1	0	0	0	0	1	1	0	0	0
0	63	1.65	-	2018-02-18	2018-03-09	19		36.3	78	78	20	131	74	2		0	0	0	0	0	0	0	0	0	0	1		0	1		1	1	0	0	0	0	0	0	0	1	1	0	0	0	0	1	0	0
1	54	1.73	66	2016-11-14	2016-11-24	10		36.4	80	80	20	123	87	7		0	0	0	0	0	0	0	0	0	0	0		0	0		0	0	0	0	0	0	0	0	0	1	0	0	0	0	0	0	0	0
1	54	1.73	-	2015-08-09	2015-09-02	24		38.5	106	106	20	152	71	7		0	1	1	0	0	0	0	0	0	0	1		0	0		0	1	0	0	0	0	0	0	0	1	0	0	0	0	1	1	0	0
0	61	1.56	-	2017-10-02	2017-10-13	11		36.9	68	68	20	122	87	2		0	1	0	0	0	0	0	0	0	0	0		0	0		0	0	0	0	0	0	0	0	0	0	0	0	0	0	0	0	0	0
1	68	1.78	74	2016-07-01	2016-08-19	49		36.2	84	84	20	139	69	10		0	1	0	0	0	0	1	0	0	0	1		0	0		0	1	0	0	0	0	0	0	0	1	0	0	0	0	1	1	0	0
1	47	1.58	52.5	2017-08-07	2017-08-28	21		36.8	76	76	20	116	82	30		0	1	0	0	0	0	0	0	0	0	0		0	0		0	0	0	0	0	0	0	0	0	0	0	0	0	0	0	0	0	0
1	42	1.78	61	2016-05-11	2016-05-24	13		36.5	68	68	20	120	86	15		0	1	0	0	0	0	0	0	0	0	0		0	0		0	0	0	0	0	0	0	0	0	1	0	0	0	0	1	1	0	0
1	29	1.75	-	2018-03-05	2018-04-17	43		36.6	80	80	22	125	77	30		0	1	0	0	0	0	0	0	0	0	0		0	0		0	0	0	0	0	0	0	0	0	1	0	0	0	0	0	1	0	0
1	75	1.66	73	2016-04-05	2016-04-18	13		36	78	78	20	121	57	10		0	1	1	0	0	0	1	0	0	0	0		0	0		0	0	0	0	0	0	0	1	0	1	0	0	0	0	0	1	0	0	0
1	18	1.67	55	2015-05-01	2015-05-15	14		36.2	70	70	24	98	55	7		0	0	0	0	0	1	1	0	0	0	0		0	0		0	0	0	0	0	0	2	0	0	0	0	0	0	0	0	0	0	0
1	64	1.74	75	2016-08-15	2016-08-26	11		36.8	88	88	16	124	71	182		0	1	1	0	0	0	0	0	0	0	0		0	0		0	0	0	0	0	0	3	0	0	1	0	0	0	0	0	0	0	0	1
1	50	1.74	65	2017-11-24	2017-12-24	30		36.5	106	106	22	98	53	10		0	0	0	0	0	0	1	0	1	0	1		0	1		0	1	2	0	0	0	0	0	0	1	0	0	0	0	0	0	0	0
0	76	1.56	70	2013-09-16	2013-10-11	25		36.8	96	96	24	103	59	7		0	0	0	0	0	0	0	0	0	0	0		0	0		1	0	0	0	0	0	8	0	0	1	0	0	0	0	1	1	0	0	1
1	43	1.72	76	2017-01-19	2017-01-27	8		38.2	104	104	20	111	61	14		0	0	0	0	0	0	1	0	0	0	0		0	0		0	0	0	0	0	0	0	0	0	1	0	0	0	0	1	0	0	0	0
0	20	1.58	65	2015-12-22	2016-01-08	17		36.8	96	96	20	133	72	10		0	1	0	0	0	1	1	0	0	0	0		0	0		0	0	0	0	1	0	0	0	0	0	0	0	0	0	0	0	0	0
0	41	1.57	49	2016-02-15	2016-02-20	5		36.5	112	112	20	111	75	30		0	0	0	0	0	0	0	0	0	0	0		0	0		0	0	0	0	0	0	0	0	0	0	0	0	0	0	0	1	0	0
1	63	1.74	-	42464	42478	14		36.5	116	116	18	95	64	30		0	1	0	0	0	0	0	0	0	0	1		0	1		0	1	2	0	0	0	0	0	0	1	0	0	0	0	0	0	0	0	1
1	36	1.6	64	2015-03-11	2015-03-21	10		36.8	108	108	22	130	82	15		0	0	0	0	0	0	0	0	0	0	0		0	0		0	0	0	0	0	0	0	0	0	1	0	0	0	0	0	0	0	0
1	51	1.56	60	2015-03-31	2015-04-18	18		36.5	104	104	20	133	93	10		0	0	0	0	0	0	0	0	0	0	1		0	0		0	1	1	0	0	0	0	0	0	0	0	0	0	0	0	0	0	0
1	51	1.75	70	2015-06-27	2015-07-06	9		36	120	120	21	118	78	182		0	0	0	0	0	0	0	0	0	0	1		0	1		0	1	0	0	0	0	0	0	0	1	0	0	0	0	0	0	0	0	1
0	47	1.68	-	42826	42839	13		38.8	112	112	34	103	50	7		1	1	1	0	0	0	1	0	1	0	0		0	0		0	0	0	0	0	0	8	1	0	1	0	0	0	0	0	1	0	0
1	65	1.7	65	2016-12-11	2016-12-22	11		37.2	106	106	24	122	73	15		0	1	0	0	0	0	0	0	0	0	0		0	0		0	0	0	0	0	0	0	0	0	0	0	0	0	0	0	1	0	0
1	65	1.63	-	2018-04-17	2018-05-10	23		36.9	88	88	22	130	68	1		0	0	0	0	0	0	0	0	0	0	0		0	0		0	0	0	0	0	0	0	0	0	1	0	0	0	0	0	1	0	0
0	48	1.58	68	2018-01-30	2018-02-10	11		36.3	80	80	20	99	69	3		0	0	0	0	0	0	0	0	0	0	0		0	0		0	0	0	0	0	0	0	0	0	0	0	0	0	0	0	1	0	0
0	53	1.57	-	2016-09-12	2016-09-21	9		36.2	76	76	20	124	67	30		1	1	0	0	0	0	0	0	0	0	0		0	0		0	0	0	0	0	0	0	1	0	0	0	0	0	0	0	0	0	0
1	69	1.69	65	2013-10-04	2013-10-24	20		38.2	90	90	20	140	78	20		0	0	1	0	0	0	0	0	0	0	0		0	0		1	0	0	0	0	1	0	0	0	1	0	0	0	0	1	1	0	0
1	66	1.65	58	43038	43049	11		36.8	70	70	20	132	80	30		0	0	0	0	0	0	0	0	0	0	1		0	0		0	1	2	0	0	0	0	0	0	1	0	0	0	0	0	1	0	0	1
0	49	1.69	59.5	42869	42879	10		36	79	79	22	126	86	8		0	1	0	0	0	0	0	0	0	0	0		0	0		0	0	0	0	0	0	0	0	0	1	0	0	0	0	0	1	0	0
1	19	1.7	74	42318	42326	8		39	138	138	24	114	69	7		0	1	0	0	0	0	0	0	0	0	0		0	0		0	0	0	0	0	0	0	0	0	1	0	0	0	0	0	1	0	0	1
0	50	1.58	80	2017-05-25	2017-06-02	8		37.9	68	68	20	109	70	7		1	1	1	0	0	0	1	0	0	0	0		0	0		0	0	0	0	0	0	0	1	0	0	0	0	0	0	0	0	0	0	0
1	67	1.7	51.5	2017-07-13	2017-08-01	19		36.3	78	78	20	135	61	60		0	0	0	0	0	0	0	0	0	0	0		0	0		0	0	0	0	0	0	8	0	0	0	0	0	0	0	0	1	0	0
0	46	1.74	-	42803	42814	11		37.7	94	94	20	119	70	5		0	1	1	0	0	0	1	0	0	0	0		0	0		0	0	0	0	0		0	0	0	1	0	0	0	0	1	1	0	0	0
1	57	1.63	61	2014-07-24	2014-08-26	33		36.3	84	84	20	161	110	15		0	0	0	0	0	0	0	0	0	0	1		0	0		1	1	0	0	0	0	9	0	0	0	0	0	0	0	0	1	0	0
1	85	1.68	-	41894	41933	39		36.2	80	80	20	92	62	120		1	0	1	1	1	1	1	0	1	0	0		0	0		0	0	0	0	0	0	8	1	0	1	0	0	0	0	0	0	0	0
1	54	1.72	-	2015-04-13	2015-04-25	12		36.5	84	84	20	119	65	20		0	0	0	0	0	0	0	0	0	0	0		0	0		0	0	0	0	0	0	0	0	0	1	0	0	0	0	1	1	0	0
0	69	1.66	-	42011	42026	15		36.5	68	68	19	85	51	10		0	1	0	1	0	0	1	0	1	0	0		0	0		0	0	0	0	1	0	0	0	0	1	1	1	0	0	0	0	1	0
1	64	1.6	65	2013-09-03	2013-11-04	62		37.9	86	86	20	110	60	30		0	0	0	0	0	0	0	0	0	0	0		0	0		0	0	0	0	0	0	0	0	0	0	0	0	0	0	0	1	0	0	1
0	58	1.72	-	41776	41811	35		37.5	120	120	22	135	80	5		0	0	0	1	1	0	1	0	0	1	0		0	0		1	0	0	0	0	0	0	0	0	1	0	0	1	1	1	1	0	0	1
1	40	1.79	56	2015-02-06	2015-02-17	11		37	76	76	18	123	76	30		0	0	0	0	0	0	0	0	0	0	0		0	0		0	0	0	0	0	0	2,7	0	0	1	0	0	0	0	1	1	0	0
1	51	1.67	60	2016-10-15	2016-12-01	47		36.5	66	66	20	102	66	5		0	1	0	0	0	0	0	0	0	0	0		0	0		0	0	0	0	0	0	8	0	0	1	0	0	0	0	0	1	0	0	0
1	47	1.75	64	2016-04-12	2016-05-06	24		36.9	74	74	20	87	54	20		0	0	0	0	0	0	1	0	0	0	0		0	0		1	0	0	0	0	0	8	0	0	1	0	0	0	0	1	1	0	0
0	54	1.65	60	2016-04-29	2016-05-10	11		36.8	72	72	20	160	81	5		0	0	0	1	0	0	0	0	0	0	1		0	0		0	1	2	0	0	0	0	0	0	0	0	0	0	0	0	1	0	0
1	32	1.58	47	2016-02-16	2016-03-04	17		36.6	90	90	20	87	62	15		0	1	0	0	0	0	0	0	0	0	0		0	0		0	0	0	0	0	0	0	0	0	0	0	0	0	0	0	0	0	0
1	73	1.68	54	2016-09-14	2016-10-11	27		36	102	102	20	156	105	7		0	0	1	0	0	0	0	0	0	0	0		0	0		1	0	0	0	0	0	6,8	0	0	1	0	0	0	0	1	1	0	0
0	50	1.67	61	41501	41519	18		38.9	76	76	20	139	84	6		1	1	0	0	0	0	1	0	0	0	0		0	0		0	0	0	0	0	0	0	0	0	1	0	0	0	0	1	1	0	0	0
0	57	1.57	58	2016-10-07	2016-10-27	20		36.7	84	84	20	106	77	7		0	0	0	0	0	0	1	0	0	0	1		0	0		1	1	2	0	0	0	0	0	0	0	0	0	0	0	0	0	0	0
1	68	1.72	-	43182	43197	15		37.6	114	114	20	153	84	20		0	1	0	0	0	0	1	0	0	0	0		0	0		0	0	0	0	0	0	7	0	0	1	0	0	1	1	1	1	1	0	1
0	47	1.52	-	2016-01-20	2016-02-22	33		37.1	90	90	20	136	74	10		0	0	0	0	0	0	0	0	0	0	0		0	0		0	0	0	0	0	0	0	0	0	0	0	0	0	0	0	0	0	0	0
1	75	1.61	59	2016-07-29	2016-08-09	11		36.1	80	80	20	96	56	10		0	0	0	0	0	0	1	0	0	0	2		0	4		0	0	0	0	0	0	0	0	0	1	0	0	0	0	0	0	0	0
0	61	1.73	-	43072	43094	22		36.7	122	122	34	132	99	3		0	0	0	0	0	1	1	0	0	1	0		0	0		1	0	0	1	0	0	0	0	0	1	0	0	0	0	1	1	0	0
0	55	1.57	-	2017-12-09	2017-12-29	20		38.7	120	120	18	96	60	7		0	1	0	0	0	0	1	0	1	0	2		0	0		0	0	0	0	0	0	0	0	0	1	1	0	0	0	1	1	0	0	1
0	61	1.6	-	2015-04-28	2015-05-15	17		37.8	80	80	20	116	64	30		0	0	0	0	0	0	0	0	0	0	0		0	0		0	0	0	0	1	0	0	0	0	1	0	0	0	0	1	0	0	0
0	58	1.67	-	42328	42349	21		37.9	114	114	24	122	63	60		0	1	0	0	0	0	0	0	0	0	0		0	0		0	0	0	0	0	0	8	0	0	1	0	0	0	0	0	0	0	0
1	67	1.75	53.5	2017-04-23	2017-05-17	24		37.6	84	84	20	103	66	7		0	1	0	0	0	1	1	0	0	0	0		0	0		0	0	0	0	0	0	2	0	0	1	0	0	0	0	1	0	0	0
0	63	1.52	54.5	2016-03-29	2016-04-07	9		36	96	96	20	107	61	15		0	0	0	0	0	0	0	0	0	0	0		0	0		0	0	0	0	0	0	0	0	0	0	0	0	0	0	0	0	0	0
0	52	1.5	55	2015-02-27	2015-03-17	18		37	104	104	20	99	60	30		0	1	0	0	0	0	0	0	0	0	0		0	0		0	0	0	0	0	0	0	0	0	0	0	0	0	0	0	0	0	0
0	72	1.53	65	2016-03-27	2016-04-13	17		36.9	106	106	20	121	71	7		0	0	1	1	0	0	1	0	1	0	1		0	0		1	1	1	0	0	0	0	0	0	0	0	0	0	0	0	0	0	0
0	47	1.49	65	2014-11-24	2014-12-30	36		36.3	88	88	24	110	70	3		0	1	0	0	0	0	0	0	0	0	0		0	0		0	0	0	0	0	0	9	0	0	0	0	0	0	0	0	1	0	0
0	60	1.62	-	42202	42238	36		36	90	90	22	150	90	1		0	0	0	0	0	0	0	0	0	1	0		0	0		0	0	0	0	0	0	0	0	0	1	0	0	0	0	1	1	0	0	0
0	51	1.51	52	43069	43077	8		36.8	72	72	20	103	70	7		0	1	0	0	0	0	1	0	0	0	2		0	0		0	0	0	0	0	0	0	0	0	0	0	0	0	0	0	0	0	0
1	46	1.61	50	2014-09-29	2014-10-17	18		36.4	96	96	20	100	69	3		0	0	0	0	1	0	1	0	0	0	1		0	1		0	1	2	0	1	1	0	0	0	1	0	0	0	0	0	0	0	0	0
0	72	1.61	58	2015-07-13	2015-09-05	54		36.5	92	92	20	112	82	182		0	0	1	0	0	0	0	0	0	0	0		0	0		1	0	0	1	0	0	8	0	0	1	0	0	0	0	1	1	0	0
0	64	1.48	64	2017-03-05	2017-03-09	4		36.3	82	82	20	166	94	60		0	0	0	0	0	0	1	0	1	0	1		0	0		1	1	1	0	0	0	0	0	0	0	0	0	0	0	0	0	0	0
0	30	1.59	50	42302	42325	23		36.3	112	112	20	83	52	0.33		0	1	1	1	0	0	0	0	0	0	0		0	0		0	0	0	0	0	0	8	1	0	1	0	0	0	0	0	0	1	0	1
0	65	1.54	60	2014-10-28	2014-11-05	8		36.5	96	96	18	121	81	3		0	0	0	0	0	0	0	0	0	0	0		0	0		1	0	0	0	0	0	0	0	0	1	0	0	0	0	0	1	0	0
0	66	1.5	51.5	2015-09-01	2015-09-22	21		37.5	92	92	20	106	72	10		1	0	0	0	1	0	1	0	0	0	1		0	0		0	1	2	0	0	0	0	0	0	0	0	0	0	0	0	1	0	0	1
0	51	1.53	50	42209	42220	11		36	98	98	20	128	79	15		0	1	1	0	0	0	0	0	0	0	0		0	0		1	0	0	0	0	0	0	0	0	1	0	0	0	0	0	0	0	0
1	72	1.71		42482	42499	17		36.9	98	98	20	102	74	30		0	0	0	0	0	1	0	0	0	0	0		0	0		0	0	0	1	1	0	8	0	0	1	1	1	1	1	1	1	1	0	1
0	60	1.56	52	41884	41918	34		36.7	74	74	20	92	64	30		0	0	0	0	0	0	0	0	0	0	0		0	0		0	0	0	0	0	0	0		0	0	0	0	0	0	0	1	0	0
0	51	1.6	53	42734	42741	7		36.5	86	86	20	105	72	20		1	1	1	0	0	0	1	0	0	0	0		0	0		0	0	0	0	0	0	0	0	0	1	0	0	0	0	0	0	0	0
0	67	1.47	-	2013-10-05	2013-10-11	6		37.5	97	97	19	95	59	60		0	0	0	0	0	0	0	0	0	0	0		0	0		0	0	0	0	0	0	8	1	0	0	0	0	0	0	0	1	0	0
0	75	1.51	51	2014-05-21	2014-05-27	6		36.6	84	84	20	123	74	5		0	1	0	0	0	0	1	0	0	0	0		0	0		0	0	0	0	0	0	0	0	0	1	0	0	0	0	1	1	0	0
1	33	1.7	-	2016-01-04	2016-02-01	28		36.6	72	72	16	119	84	120		0	0	0	0	0	0	0	0	0	0	0		0	0		0	0	0	0	0	0	0	0	0	0	0	0	0	0	0	0	0	0
0	45	1.51	43	2016-09-26	2016-11-25	60		37	80	80	20	120	80	1		0	0	0	0	0	0	0	0	0	0	2		0	0		0	0	0	0	0	0	2	0	0	1	0	0	0	0	1	1	0	0	0
1	18	1.78	54	42265	42284	19		37.3	86	86	20	89	49	20		0	0	0	0	0	0	0	0	0	0	0		0	0		0	0	0	0	0	0	0	0	0	1	0	0	0	0	0	0	1	0
0	34	1.54	45	42213	42226	13		36	92	92	20	83	51	15		0	1	0	0	0	0	0	0	0	0	0		0	0		0	0	0	0	0	0	0	0	0	1	0	0	0	0	0	1	0	0
0	76	1.51	53	43185	43193	8		36.3	64	64	20	123	61	10		0	1	1	1	0	0	1	0	1	0	0		0	0		1	0	0	0	0	0	0	0	0	1	1	1	0	0	1	1	0	0
1	32	1.78	-	2017-08-26	2017-09-27	32		37.8	102	102	21	98	65	5		0	1	1	0	0	0	1	0	0	0	2		1	1		0	0	0	0	0	0	0	0	0	1	1	1	1	1	1	1	1	1
0	82	1.47	50	2015-08-10	2015-08-31	21		36.5	84	84	20	159	84	7		0	1	0	0	0	0	0	0	0	0	0		0	0		0	0	0	0	0	0	0	0	0	0	0	0	0	0	0	1	0	0	1
0	44	1.55	37	2014-06-03	2014-06-27	24		36.6	68	68	20	95	58	7		0	0	0	0	0	0	0	0	1	0	2		0	0		0	0	0	0	0	0	0	0	0	0	0	0	0	0	0	0	0	0	0
1	64	0	50	2013-08-15	2013-08-22	7		36.3	60	60	20	139	77	10		0	1	0	0	0	0	0	0	0	0	1		0	0		0	1	0	0	0	0	0	0	0	0	0	0	0	0	0	0	0	0
0	73	1.45	46	2019-02-11	2019-03-08	25		36	62	62	20	123	77	10		0	1	0	0	1	0	1	0	0	0	1		0	0		0	1	3	0	1	1	4,5,7	0	0	1	0	0	1	1	1	1	0	0
1	51	0	65	2017-08-10	2017-08-30	20		36.7	64	64	18	137	90	3		0	1	1	1	0	0	1	0	1	0	0		0	0		0	0	0	0	0	0	4,7	1	0	1	0	0	0	0	1	1	0	0	1
1	42	0	80	2011-11-04	2011-12-14	40		37	64	64	20	114	61	4		0	0	0	0	0	1	1	1	1	0	0		0	0		0	0	0	0	0	0	8	0	0	1	0	0	0	0	1	1	0	0
1	60	0	54	2017-03-15	2017-03-29	14		36.6	66	66	20	98	64	7		0	0	0	0	0	1	1	0	1	0	0		0	0		0	0	0	0	0	0	0	0	0	1	0	0	0	0	1	0	0	0
1	42	0	59.5	2012-08-14	2012-08-21	7		36.7	66	66	20	99	56	7		1	1	0	0	0	0	1	0	0	0	0		0	0		0	0	0	0	0	0	0	0	0	1	0	0	0	0	1	1	0	0	1
1	33	1.78	-	2012-01-02	2012-01-11	9		36	67	67	20	130	80	10		0	0	0	0	0	1	1	0	0	0	2		0	0		0	0	0	0	0	0	0	0	0	0	0	0	0	0	0	0	0	0	0
1	56	0	80	2014-06-20	2014-07-10	20		36.4	68	68	20	85	55	5		0	1	1	1	1	0	1	0	0	0	0		0	0		0	0	0	0	0	0	0	0	0	1	0	0	0	0	0	0	0	0
0	55	0	53	2013-07-17	2013-09-27	72		36.4	68	68	20	140	90	14		0	1	1	0	0	1	1	0	0	0	0		0	0		1	0	0	0	1	0	0	0	0	1	0	0	0	0	0	0	0	0
0	42	1.64	62	2021-03-31	2021-04-25	25		36.7	68	68	20	113	60	3		1	0	1	1	0	1	1	0	0	0	1		1	1		0	1	0	0	0	0	7	0	0	1	0	0	1	1	1	1	1	0
1	70	0	55	2014-01-09	2014-01-27	18		37.6	68	68	18	118	66	7		0	0	0	0	0	0	0	0	0	0	0		0	0		0	0	0	0	0	0	0	0	0	0	0	0	0	0	0	0	0	0
1	32	0	53	2015-05-02	2015-05-11	9		36.3	70	70	17	98	67	7		0	0	0	0	0	0	0	0	0	0	2		0	0		0	0	0	0	0	0	0	0	0	1	0	0	0	0	0	0	0	0
1	46	0	-	2013-03-07	2013-03-09	2		36.4	70	70	20	120	80	20		0	1	0	0	0	0	0	0	0	0	0		0	0		0	0	0	0	0	0	0	0	0	0	0	0	0	0	0	0	0	0
1	49	0	71	2013-05-21	2013-05-29	8		36.5	70	70	20	112	69	8		0	0	0	0	0	0	0	0	0	0	0		0	0		0	0	0	0	0	0	0	0	0	1	0	0	0	0	0	0	0	0
1	27	0	73	2012-08-30	2012-09-13	14		36.5	70	70	20	128	73	15		0	1	0	0	0	0	1	0	1	0	1		0	0		0	1	0	0	0	0	2	0	0	1	0	0	0	0	0	0	0	0	0
1	20	0	70	2014-01-15	2014-01-27	12		36.7	70	70	18	128	83	60		0	0	0	0	0	0	0	0	0	0	0		0	0		0	0	0	0	1	0	0	1	0	0	0	0	0	0	0	0	0	0
0	81	0	52.5	2017-01-04	2017-01-18	14		36.8	70	70	16	169	69	15		0	0	1	0	0	0	0	0	0	0	1		0	0		1	1	0	0	0	0	0	0	0	1	1	0	0	0	0	0	0	0
1	44	0	60	2017-11-20	2017-11-28	8		36.3	72	72	10	131	83	30		0	0	0	0	0	0	0	0	0	0	0		0	0		0	0	0	0	0	0	0	0	0	0	0	0	0	0	0	0	0	0
1	65	0	60	2016-10-26	2016-11-04	9		36.7	72	72	20	123	81	30		0	0	0	0	0	0	0	0	0	0	1		0	0		1	1	2	0	0	0	0	0	0	0	0	0	0	0	0	1	0	0
1	46	0	-	2017-03-26	2017-03-30	4		36.8	72	72	30	131	92	7		0	1	1	0	0	0	1	0	0	0	1		0	1		0	1	1	0	0	0	0	0	0	0	0	0	0	0	0	0	0	0
1	63	0	70.5	2017-10-27	2017-11-15	19		37.1	72	72	20	122	81	10		0	0	0	0	0	0	0	0	0	0	0		0	0		0	0	0	0	0	0	0	0	0	0	0	0	0	0	0	0	0	0	1
0	51	0	60	2014-05-19	2014-06-10	22		37.2	72	72	20	116	60	15		0	1	0	0	0	0	0	0	0	0	1		0	0		0	1	3	0	0	0	0	0	0	1	0	0	0	0	1	1	0	0
1	74	0	-	2017-12-25	2018-01-11	17		36.1	74	74	20	139	83	10		1	0	0	1	0	1	1	0	0	1	0		0	0		0	0	0	1	0	0	0	0	0	1	1	0	0	0	1	1	1	0	1
0	67	0	64	2013-09-26	2013-10-11	15		36.2	74	74	18	118	59	10		1	0	1	0	0	0	0	0	0	0	0		0	0		1	0	0	0	1	0	0	0	0	0	0	0	0	0	0	0	0	0
0	63	0	64	2016-05-10	2016-05-30	20		36.7	74	74	20	107	73	10		0	1	0	0	0	0	0	0	0	0	0		0	0		0	0	0	0	0	0	7	0	0	0	0	0	0	0	0	0	0	0
1	62	0	70	2014-01-07	2014-01-08	1		36.7	74	74	16	153	102	10		0	1	0	0	0	0	0	0	0	0	0		0	0		0	0	0	0	0	0	8	0	0	0	0	0	0	0	0	0	0	0
0	57	0	-	2017-04-23	2017-04-28	5		36.7	74	74	20	109	66	20		1	0	1	1	0	1	1	0	0	0	0		0	0		0	0	0	0	0	0	0	0	0	1	0	0	0	0	1	1	0	0
1	30	0	86	2016-08-29	2016-09-04	6		36.7	74	74	20	155	100	10		0	1	0	0	0	0	0	0	0	0	0		0	0		0	0	0	0	0	0	0	0	0	0	0	0	0	0	0	0	0	0
0	64	0	55	2014-05-11	2014-05-19	8		38.3	74	74	20	103	62	4		0	1	0	0	0	0	0	0	0	0	0		0	0		0	0	0	0	0	0	0	0	0	1	0	0	0	0	0	0	0	0	1
1	58	1.75	69	2016-09-21	2016-10-10	19		36.6	75	75	18	128	92	5		0	0	0	0	0	0	0	0	0	0	0		0	0		0	0	0	0	1	0	0	0	0	1	0	0	0	0	1	1	0	0	1
0	55	0	70	2013-03-18	2013-04-16	29		38.1	75	75	20	120	80	7		0	1	0	0	0	0	0	0	0	0	0		0	0		0	0	0	0	0	0	0	0	0	1	0	0	0	0	0	1	0	0
1	36	0	-	2012-06-18	2012-06-25	7		38.3	75	75	20	137	72	2		0	1	1	0	1	1	1	0	0	0	0		0	0		0	0	0	1	0	0	0	0	0	0	0	0	0	0	0	0	0	0
0	53	0	48	2017-03-15	2017-03-28	13		36.1	76	76	22	111	74	15		0	0	0	0	0	0	0	0	0	0	1		0	1		0	1	0	0	0	0	0	0	0	0	0	0	0	0	0	0	0	0
1	63	0	40	2016-09-09	2016-09-15	6		36.2	76	76	20	107	71	30		0	1	0	0	0	0	1	0	1	0	0		0	0		0	0	0	0	0	0	0	1	0	0	0	0	0	0	0	1	0	0	1
1	47	0	80	2013-10-07	2013-10-19	12		36.2	76	76	20	113	66	8		0	1	0	0	0	0	0	0	0	0	0		0	0		0	0	0	0	0	0	0	0	0	1	0	0	0	0	1	1	0	0
1	41	0	52	2015-11-03	2015-11-11	8		36.2	76	76	20	108	54	14		1	0	0	0	0	0	1	0	0	0	0		0	0		0	0	0	0	0	0	2,8	0	0	0	0	0	0	0	0	0	0	0	0
1	75	0	54	2016-08-11	2016-08-19	8		36.3	76	76	20	100	59	15		0	1	0	0	0	0	1	0	0	0	1		0	0		0	1	0	0	0	0	0	0	0	0	0	0	0	0	0	0	0	0	0
0	52	0	42	2017-06-13	2017-06-30	17		36.3	76	76	18	100	60	10		0	0	0	0	0	0	0	0	0	0	0		0	0		0	0	0	0	0	0	8	0	0	0	0	0	0	0	0	0	0	0
0	58	0	-	2016-03-31	2016-04-18	18		36.4	76	76	20	103	76	7		0	1	0	0	0	0	0	0	0	0	0		0	0		0	0	0	0	0	0	0	0	0	1	0	0	0	0	0	1	0	0
0	53	0	70	2017-10-09	2017-10-30	21		36.4	76	76	20	106	61	5		0	1	1	0	0	0	0	0	0	0	0		0	0		0	0	0	0	0	0	0	0	0	0	0	0	0	0	0	1	0	0
0	73	1.62	-	2017-11-05	2017-11-16	11		36.5	76	76	18	124	68	120		0	1	0	0	0	0	0	0	0	0	0		0	0		1	0	0	0	0	0		0	0	1	0	0	0	0	1	1	0	0
1	42	0	70	2014-12-18	2014-12-19	1		36.5	76	76	20	109	80	30		0	1	0	0	0	0	0	0	0	0	0		0	0		0	0	0	0	0	0	0	0	0	0	0	0	0	0	0	0	0	0
1	37	0	53	2014-12-24	2014-12-29	5		36.5	76	76	20	107	78	60		0	1	0	0	0	0	1	0	0	0	1		0	0		0	1	1	0	0	0	0	0	0	1	0	0	0	0	0	0	0	0
1	34	0	65	2015-09-11	2015-09-25	14		36.5	76	76	20	114	68	60		0	0	0	0	0	0	0	0	0	0	0		0	0		0	0	0	0	0	0	2	0	0	1	0	0	0	0	1	1	0	0
1	65	0	87	2014-04-05	2014-04-24	19		36.6	76	76	20	122	68	15		0	0	0	1	1	0	0	0	0	0	2		0	0		0	0	0	0	0	0	0	0	0	0	0	0	0	0	0	1	0	0
1	52	0	61	2014-07-30	2014-08-03	4		36.6	76	76	18	133	102	15		0	0	0	0	0	0	0	0	0	0	0		0	0		0	0	0	0	0		0	0	0	0	0	0	0	0	0	0	0	0
0	50	0	56	2017-09-10	2017-09-22	12		36.6	76	76	20	121	74	15		0	1	1	0	0	0	1	0	0	0	0		0	0		0	0	0	0	0	0	0	0	0	0	0	0	0	0	0	0	0	0
0	60	0	62.5	2017-01-03	2017-01-11	8		36.9	76	76	18	141	89	5		0	0	0	0	0	0	0	0	0	0	0		0	0		0	0	0	0	0	0	0	0	0	0	0	0	0	0	0	0	0	0
0	68	0	55.5	2016-05-23	2016-06-01	9		37.5	76	76	20	113	61	15		0	1	0	0	0	0	1	0	0	0	0		0	0		0	0	0	0	0	0	0	1	0	0	0	0	0	0	0	0	0	0
1	72	0	60.5	2013-07-08	2013-07-16	8		37.8	76	76	20	120	62	10		0	1	0	0	0	0	0	0	0	0	0		0	0		0	0	0	0	0	0	0	0	0	0	0	0	0	0	0	1	0	0
1	62	0	92	2016-12-12	2016-12-30	18		38	76	76	20	152	82	20		0	1	0	0	0	0	0	0	0	0	1		0	0		0	1	1	1	0	0	0	0	0	1	1	0	0	0	1	1	0	0	1
1	66	0	-	2016-01-13	2016-01-22	9		36	78	78	18	115	68	60		0	1	1	0	0	0	1	0	0	0	0		0	0		0	0	0	0	0	1	0	0	0	1	0	0	0	0	0	0	0	0	0
1	60	0	70	2016-10-12	2016-11-01	20		36	78	78	20	134	65	3		0	1	1	0	0	0	0	0	0	0	0		0	0		1	0	0	0	0	0	0	0	0	1	0	0	0	0	1	1	0	0	1
1	25	0	81	2016-03-09	2016-04-05	27		36	78	78	20	116	78	365		0	1	0	0	0	0	0	0	0	0	0		0	0		0	0	0	0	0	0	10	0	0	1	0	0	0	0	0	1	0	0	1
1	62	0	65	2014-06-19	2014-07-11	22		36.1	78	78	20	137	91	3		1	1	0	0	0	0	1	0	1	0	0		0	0		1	0	0	0	0	0	0	1	0	1	0	0	0	0	0	0	0	0
1	14	0	54	2017-08-08	2017-08-21	13		36.2	78	78	22	117	71	4		0	0	0	0	0	0	0	0	0	0	0		0	0		0	0	0	0	0	0	0	0	0	0	0	0	0	0	0	0	0	0
1	50	0	75	2016-06-19	2016-07-04	15		36.3	78	78	20	118	53	10		0	0	0	0	0	0	0	0	0	0	0		0	0		0	0	0	0	0	0	0	0	0	1	0	0	0	0	1	0	0	0
1	64	0	57	2017-09-26	2017-10-31	35		36.4	78	78	20	111	75	15		0	1	0	0	0	0	0	0	0	0	0		0	0		0	0	0	0	0	0	8	0	0	1	0	0	0	0	0	0	0	0
1	74	0	-	2013-04-09	2013-04-17	8		36.5	78	78	20	94	64	10		0	0	0	0	0	0	0	0	0	0	1		0	1		0	1	0	0	0	0	0	0	0	1	0	0	0	0	0	0	0	0
1	63	0	63	2017-03-10	2017-03-23	13		36.5	78	78	16	113	75	30		0	1	0	0	0	0	1	0	0	0	0		0	0		1	0	0	0	0	0	3,4	0	0	0	0	0	0	0	0	0	0	0
1	57	0	66	2015-10-01	2015-10-22	21		36.5	78	78	20	140	84	7		0	0	0	0	0	0	0	0	0	0	1		0	0		1	1	0	0	0	0	0	0	0	0	0	0	0	0	0	0	0	0
1	55	0	58	2017-09-27	2017-10-08	11		36.5	78	78	20	125	67	15		0	0	0	0	0	0	0	0	0	0	1		0	0		0	1	1	0	0	0	0	0	0	1	0	0	0	0	0	0	0	0
1	53	0	64	2016-06-16	2016-07-08	22		36.5	78	78	20	97	57	14		0	1	0	0	0	0	1	0	0	0	0		0	0		1	0	0	0	0	0	0	0	0	1	0	0	0	0	0	0	0	0	0
0	45	0	40	2016-12-12	2016-12-16	4		36.5	78	78	20	93	67	60		0	0	0	0	0	0	0	0	0	0	0		0	0		0	0	0	0	0	0	2	0	0	0	0	0	0	0	0	0	0	0
1	43	1.75	75	2016-04-19	2016-05-10	21		36.5	78	78	20	120	70	7		0	0	0	0	0	0	1	0	0	0	0		0	0		0	0	0	0	0	0	5,6	0	0	1	0	0	0	0	0	0	0	0
0	71	0	-	2017-09-28	2017-10-14	16		36.6	78	78	20	126	62	15		0	1	0	0	0	0	0	0	0	0	0		0	0		0	0	0	0	0	0	0	0	0	1	0	0	0	0	0	0	0	0	1
0	68	0	57	2018-02-21	2018-02-26	5		36.6	78	78	20	141	81	60		0	1	1	0	0	0	0	0	0	0	2		0	0		0	0	0	0	0	0	0	1	0	0	0	0	0	0	0	0	0	0	0
0	46	0	66	2018-01-29	2018-02-13	15		36.6	78	78	20	107	74	30		0	0	0	0	0	0	0	0	0	0	0		0	0		0	0	0	0	0	0	4	0	0	0	0	0	0	0	0	1	0	0
1	68	0	75	2016-10-11	2016-10-19	8		36.7	78	78	20	129	79	20		0	1	0	0	0	0	0	0	0	0	0		0	0		1	0	0	0	0	0	0	0	0	0	0	0	0	0	0	0	0	0	1
0	67	0	65	2014-06-11	2014-06-27	16		36.8	78	78	20	122	80	15		0	0	0	0	0	0	0	0	0	0	1		0	0		0	1	0	0	0	0	0	0	0	0	0	0	0	0	0	0	0	0
1	53	0	90	2014-12-19	2015-01-23	35		36.8	78	78	18	124	76	7		0	1	0	0	0	0	0	0	0	0	0		0	0		1	0	0	0	0	0	0	0	0	1	0	0	0	0	0	0	0	0
1	36	0	62	2018-02-02	2018-02-27	25		36.8	78	78	20	120	78	30		0	0	0	0	0	0	0	0	0	0	2		0	0		0	0	0	0	0	0	0	0	0	1	0	0	0	0	1	1	0	0	0
0	70	0	65	2017-10-28	2017-11-04	7		36.9	78	78	22	130	88	8		0	0	0	0	0	0	0	0	0	0	0		0	0		0	0	0	0	0	0	0	0	0	0	0	0	0	0	0	0	0	0	1
1	48	1.6	74	2014-06-03	2014-06-18	15		36.9	78	78	20	127	76	150		0	0	0	0	0	0	0	0	0	0	0		0	0		0	0	0	0	0	0	0	0	0	1	0	0	0	0	1	0	0	0
1	46	0	67	2013-10-16	2013-10-28	12		37	78	78	20	128	74	60		0	1	0	0	0	0	0	0	0	0	0		0	0		0	0	0	0	0	0	8	0	0	1	0	0	0	0	1	1	0	0
1	67	0	-	2012-05-21	2012-05-24	3		37.2	78	78	14	133	87	10		0	1	0	0	0	0	0	0	0	0	1		0	0		0	1	0	0	0	0	0	0	0	0	0	0	0	0	0	0	0	0
1	47	0	60	2013-06-17	2013-07-09	22		37.2	78	78	20	110	80	14		0	1	1	0	1	0	0	0	0	0	0		0	0		0	0	0	0	0	0	0	0	0	1	0	0	0	0	0	1	0	0	1
1	69	0	65	2014-05-21	2014-05-31	10		37.3	78	78	22	127	78	30		0	1	0	0	0	0	0	0	0	0	0		0	0		0	0	0	0	0	0	0	0	0	0	0	0	0	0	0	1	0	0
0	68	0	-	2011-12-18	2011-12-29	11		37.4	78	78	20	103	63	9		0	0	0	0	0	0	0	0	0	0	0		0	0		0	0	0	0	0	0	3	0	0	1	0	0	0	0	0	0	0	0
1	55	1.75	70	2012-08-19	2012-08-27	8		37.5	78	78	20	113	63	7		0	0	0	0	0	0	1	0	0	0	1		0	0		0	1	0	0	0	0	0	0	0	1	0	0	0	0	1	1	0	0
1	72	0	65	2013-04-16	2013-04-19	3		36	80	80	20	140	69	15		0	0	1	0	0	0	0	0	0	0	0		0	0		1	0	0	0	0	0	0	0	0	0	0	0	0	0	0	0	0	0
1	63	0	61	2015-08-03	2015-08-24	21		36.2	80	80	20	101	57	365		0	0	0	0	0	0	1	0	0	0	1		0	0		0	1	1	0	0	0	8	0	0	0	0	0	0	0	0	0	0	0	0
1	42	0	80	2017-09-13	2017-09-26	13		36.3	80	80	20	120	80	10		0	0	0	0	0	0	0	0	0	0	0		0	0		0	0	0	0	0	0	0	0	0	0	0	0	0	0	0	0	0	0
1	70	0	44	2014-02-10	2014-03-17	35		36.5	80	80	20	120	80	90		0	0	0	0	0	0	0	0	0	0	1		0	0		1	1	0	0	0	0	0	0	0	0	0	0	0	0	0	0	0	0
0	68	0	55	2017-05-29	2017-06-02	4		36.5	80	80	20	168	97	8		0	1	1	0	0	0	1	0	0	0	1		0	0		1	1	2	0	0	0	8	0	0	1	0	0	0	0	0	0	0	0	0
1	64	0	67	2015-06-14	2015-07-01	17		36.5	80	80	22	106	69	5		0	1	1	0	0	0	0	0	0	0	0		0	0		1	0	0	0	0	0	8	1	0	1	0	0	0	0	0	1	0	0
1	51	0	66	2013-03-01	2013-03-08	7		36.6	80	80	20	132	70	60		0	0	0	0	0	0	1	0	0	0	2		0	0		0	0	0	0	0	0	0	0	0	0	0	0	0	0	0	0	0	0
1	40	0	-	2013-05-28	2013-06-11	14		36.6	80	80	20	102	70	21		0	1	1	0	0	0	1	0	1	0	0		0	0		0	0	0	0	0	0	0	0	0	1	0	0	0	0	0	0	0	0	0
0	63	0	60	2018-02-08	2018-03-15	35		36.7	80	80	20	120	61	7		0	1	0	0	0	1	0	0	0	0	0		0	0		0	0	0	0	0	0	8	0	0	1	0	0	0	0	1	1	0	0	1
1	49	0	68	2016-05-10	2016-05-13	3		36.7	80	80	20	109	70	15		0	1	0	0	0	0	0	0	0	0	0		0	0		0	0	0	0	0	0	0	0	0	0	0	0	0	0	0	0	0	0
1	56	0	67.5	2017-06-19	2017-06-25	6		36.8	80	80	22	136	96	15		0	1	0	0	0	0	0	0	0	0	0		0	0		0	0	0	0	0	0	0	0	0	0	0	0	0	0	0	0	0	0
1	52	0	-	2014-12-09	2014-12-11	2		36.8	80	80	20	120	76	15		0	0	0	0	0	0	0	0	0	0	1		0	0		0	1	0	0	0	0	0	0	0	1	0	0	0	0	0	1	0	0
1	15	1.65	46	2018-05-03	2018-05-22	19		36.8	80	80	16	104	71	4		0	0	0	0	0	0	0	0	0	0	0		0	0		0	0	0	0	0	0	8	0	1	1	0	0	0	0	0	0	0	0
1	68	0	-	2017-06-20	2017-06-23	3		36.9	80	80	16	159	93	10		0	0	0	0	0	0	1	0	0	0	1		0	1		0	1	0	0	0	0	8	0	0	1	0	0	0	0	0	0	0	0	1
1	68	0	-	2016-03-08	2016-03-15	7		37	80	80	20	160	100	15		0	0	0	0	0	0	1	0	1	0	2		0	0		0	0	0	0	0	0	0	0	0	0	0	0	0	0	0	0	0	0
0	57	0	65	2016-10-21	2016-10-27	6		37	80	80	20	132	78	15		0	0	0	0	0	0	0	0	0	0	0		0	0		0	0	0	0	0	0	0	0	0	0	0	0	0	0	0	0	0	0
0	55	1.57	62	2017-12-29	2018-01-16	18		37	80	80	18	128	92	20		0	0	0	0	0	0	0	0	0	0	2		0	0		0	0	0	0	0	0	2	0	0	0	0	0	0	0	0	1	0	0
1	52	0	59	2015-09-11	2015-09-24	13		37	80	80	20	93	65	15		0	1	0	0	0	0	0	0	0	0	0		0	0		0	0	0	0	0	0	2	0	0	0	0	0	0	0	0	0	0	0	1
1	47	0	77	2015-04-05	2015-04-21	16		37	80	80	20	132	78	10		0	1	0	1	0	0	1	0	1	1	0		0	0		0	0	0	0	0	0	0	0	0	1	0	0	0	0	0	1	0	0
1	45	0	65	2018-03-13	2018-03-26	13		37	80	80	26	125	86	90		0	0	1	0	0	0	0	0	0	0	2		0	0		0	0	0	0	0	0	0	0	0	0	0	0	0	0	0	1	0	0
0	34	0	-	2015-02-12	2015-02-16	4		37	80	80	24	96	58	8		0	1	0	0	0	0	0	0	0	0	0		0	0		0	0	0	0	0	0	0	0	0	1	0	0	0	0	1	0	0	0
0	66	0	43	40987	40991	4		37.1	80	80	20	113	66	14		0	0	0	0	0	0	1	0	1	0	0		0	0		0	0	0	0	0	0	0	0	0	1	0	0	0	0	1	0	0	0
1	35	0	-	2015-03-06	2015-03-20	14		37.3	80	80	20	121	76	5		0	1	0	0	0	0	0	0	0	0	0		0	0		0	0	0	0	0	0	2	0	0	1	0	0	0	0	0	0	0	0
1	47	1.74	60	2013-01-11	2013-02-06	26		37.9	80	80	20	110	80	10		1	0	0	0	0	0	1	0	1	0	0		0	0		0	0	0	0	0	0	0	0	0	0	0	0	0	0	0	0	0	0
0	45	0	-	2015-02-09	2015-02-17	8		38	80	80	24	-		30		0	1	0	0	0	0	0	0	0	0	1		0	1		0	1	1	0	0	0	0	0	0	0	0	0	0	0	0	0	0	0
1	42	0	56	2012-11-22	2013-01-03	42		38	80	80	20	106	75	40		0	0	0	0	0	1	1	0	0	0	0		0	0		0	0	0	0	0	0	0	1	0	0	0	0	0	0	0	0	0	0
1	47	0	57	2017-04-12	2017-04-26	14		38.7	80	80	20	142	83	8		0	1	0	0	0	0	0	0	0	0	0		0	0		1	0	0	0	0	0	3	0	0	0	0	0	0	0	0	0	0	0
1	61	0	60	2015-12-04	2015-12-20	16		36.3	82	82	16	150	84	5		0	1	0	0	0	0	0	0	0	0	0		0	0		1	0	0	0	0	0	0	0	0	0	0	0	0	0	0	0	0	0	1
0	55	1.58	61.5	2011-11-22	2011-12-01	9		36.3	82	82	20	121	68	60		0	1	0	0	0	0	0	0	0	0	1		0	0		0	1	0	0	0	0	3	0	0	1	0	0	0	0	0	0	0	0
1	50	0	60	2013-09-12	2013-09-20	8		36.3	82	82	20	89	65	15		0	1	0	0	0	0	0	0	0	0	0		0	0		0	0	0	0	0	0	0	0	0	0	0	0	0	0	0	0	0	0	0
1	34	0	67	2015-08-19	2015-08-28	9		36.3	82	82	22	102	57	60		0	0	0	0	0	0	0	0	0	0	0		0	0		0	0	0	0	0	0	2	0	0	0	0	0	0	0	0	0	0	0	1
1	46	0	84	2013-04-21	2013-05-06	15		36.5	82	82	20	133	98	10		0	0	0	0	0	0	0	0	0	0	0		0	0		0	0	0	0	0	0	0	0	0	0	0	0	0	0	0	0	0	0
1	22	0	77	2015-05-11	2015-06-02	22		36.5	82	82	20	103	70	10		0	1	1	0	0	0	1	0	0	0	0		0	0		0	0	0	0	0	0	0	0	0	0	0	0	0	0	0	1	0	0
1	55	0	63	2017-06-25	2017-07-11	16		36.8	82	82	20	153	92	30		0	0	0	0	0	0	0	0	0	0	1		0	0		1	1	0	0	0	0	1	0	0	0	0	0	0	0	0	0	0	0	1
1	55	0	70	2017-01-17	2017-01-23	6		37	82	82	20	117	73	15		0	0	0	0	0	0	0	0	0	0	1		0	0		0	1	0	0	0	0	0	0	0	0	0	0	0	0	0	1	0	0
1	61	0	76	2016-10-16	2016-11-08	23		36.3	83	83	20	133	81	14		0	1	0	0	0	0	1	0	0	0	0		0	0		0	0	0	0	0	0	8	0	0	1	0	0	0	0	1	1	0	0
0	52	1.61	50	2015-06-12	2015-07-23	41		36.4	83	83	20	133	80	21		0	0	0	0	0	1	1	0	0	0	2		0	1		0	0	0	0	0	0	0	0	0	1	0	0	0	0	0	1	0	0
0	55	1.58	64	2011-10-15	2011-11-04	20		36.5	83	83	20	125	70	20		0	0	0	0	0	1	0	0	0	0	1		0	0		0	1	0	0	0	0	3	0	0	1	0	0	0	0	1	1	0	0
1	65	0	-	2016-06-12	2016-07-05	23		36	84	84	20	90	71	1		0	0	0	0	0	0	0	0	0	0	1		0	0		0	1	0	0	0	0	8	1	0	0	0	0	0	0	0	0	0	0
0	67	0	78	2013-03-27	2013-04-16	20		36.1	84	84	19	144	83	10		0	0	0	0	0	0	1	0	0	0	1		0	0		1	1	1	0	0	0	0	0	0	1	0	0	0	0	1	0	0	0
1	14	0	53	2013-01-14	2013-01-18	4		36.2	84	84	20	133	78	8		0	1	0	0	0	0	0	0	0	0	0		0	0		0	0	0	0	0	0	0	0	0	0	0	0	0	0	0	0	0	0
0	54	0	54	2015-08-07	2015-08-21	14		36.3	84	84	20	129	67	7		0	1	1	0	0	0	0	0	0	0	0		0	0		1	0	0	0		0	0	0	0	0	0	0	0	0	0	1	0	0
1	43	0	59	2018-03-09	2018-03-21	12		36.3	84	84	22	118	68	7		0	0	0	0	0	0	0	0	0	0	0		0	0		0	0	0	0	0	0	0	0	0	1	0	0	0	0	0	1	0	0
1	42	0	-	2015-04-14	2015-04-20	6		36.3	84	84	20	134	93	40		0	0	0	0	0	0	1	0	0	0	0		0	0		0	0	0	0	0	0	2	1	0	0	0	0	0	0	0	0	0	0
1	50	0	72	2015-08-11	2015-08-25	14		36.4	84	84	20	88	68	10		0	0	0	0	0	0	0	0	0	0	1		0	0		0	1	0	0	0	0	0	0	0	1	0	0	0	0	0	0	1	0
1	49	0	58	2011-12-16	2012-01-06	21		36.4	84	84	20	105	65	5		0	0	1	0	0	0	0	0	0	0	0		0	0		0	0	0	0	0	0	0	0	0	0	0	0	0	0	0	0	0	0
0	48	0	52	2014-06-27	2014-07-16	19		36.5	84	84	22	128	86	15		0	1	0	0	0	0	0	0	0	0	0		0	0		0	0	0	0	0	0	0	0	0	0	0	0	0	0	0	0	0	0	1
1	46	0	-	2015-10-01	2015-10-05	4		36.5	84	84	20	110	67	10		0	1	0	0	0	0	0	0	0	0	0		0	0		0	0	0	0	0	0	0	0	0	1	1	0	0	0	1	1	0	0
1	46	0	75	2014-11-18	2014-12-09	21		36.5	84	84	16	141	78	3		0	0	0	0	0	0	0	0	0	0	0		0	0		0	0	0	0	0	0	0	0	0	0	0	0	0	0	0	0	0	0
1	38	0	76	2017-07-20	2017-08-01	12		36.5	84	84	20	106	84	30		0	0	0	0	0	1	0	0	0	0	0		0	0		0	0	0	0	0	0	0	0	0	0	0	0	0	0	0	0	0	0
1	51	0	65	2015-10-13	2015-11-05	23		36.8	84	84	20	115	73	60		0	0	0	0	0	0	1	0	0	0	0		0	0		0	0	0	0	0	0	0	0	0	0	0	0	0	0	0	0	0	0
1	48	1.75	73	2013-09-05	2013-09-21	16		36.8	84	84	20	139	89	10		0	0	0	0	0	1	1	0	0	0	1		0	1		0	1	1	0	0	0	0	0	0	1	0	0	0	0	0	1	1	0
1	41	0	-	2016-10-01	2016-10-13	12		36.8	84	84	20	143	84	4		0	0	1	0	0	0	1	0	0	0	1		0	1		0	1	0	0	0	0	0	0	0	1	1	0	0	0	0	0	0	0	1
1	68	0	85	2016-10-19	2016-10-29	10		37.1	84	84	20	145	83	17		0	0	1	0	0	0	0	0	0	0	1		0	0		0	1	1	0	1	0	0	0	0	0	0	0	0	0	0	0	0	0
0	60	0	-	2012-11-19	2012-11-23	4		37.1	84	84	20	128	90	4		0	0	0	0	0	0	0	0	1	0	0		0	0		0	0	0	0	0	0	0	1	0	1	0	0	0	0	0	0	0	0
0	58	0	59	2015-12-24	2016-01-10	17		37.2	84	84	20	137	85	5		0	1	0	0	0	0	1	0	0	0	1		0	0		1	1	0	0	0	0	8	0	0	1	0	0	0	0	0	0	0	0	0
1	81	0	72	2018-04-24	2018-05-25	31		37.3	84	84	20	149	76	10		0	1	0	0	0	0	0	0	0	0	0		0	0		1	0	0	0	1	0	0	0	0	1	0	0	0	0	0	0	0	0
0	52	0	-	2013-01-11	2013-01-28	17		37.4	84	84	22	98	62	5		0	1	0	0	0	0	0	0	0	0	1		1	1		1	1	0	0	0	0	0	0	0	1	0	0	0	0	0	1	0	0
1	38	0	76	2015-11-23	2015-12-17	24		37.4	84	84	21	126	65	7		1	1	1	0	0	0	1	0	1	0	0		0	0		0	0	0	0	0	0	8	0	0	0	0	0	0	0	0	1	0	0
1	60	1.78	70	2012-01-13	2012-02-03	21		37.7	84	84	20	109	66	40		0	0	0	0	0	0	1	0	1	0	0		0	0		0	0	0	1	0	0	3	0	0	0	0	0	0	0	0	0	0	0
0	54	0	58	2012-06-25	2012-07-09	14		38.1	84	84	22	139	91	15		0	1	0	0	0	0	0	0	0	0	1		0	0		0	1	0	0	0	0	0	0	0	0	0	0	0	0	0	1	0	0
0	62	0	-	2015-09-24	2015-10-28	34		37.5	85	85	18	126	65	6		0	1	0	0	0	0	0	0	0	0	1		1	1		0	1	2	0	0	0	8	0	0	1	0	0	0	0	1	1	0	0	1
1	57	0	80	2012-10-13	2012-10-29	16		38.6	85	85	20	131	70	5		0	0	0	0	0	1	1	0	1	0	0		0	0		0	0	0	1	0	0	0	0	0	1	0	0	0	0	0	0	0	0
1	62	0	-	2017-06-23	2017-06-28	5		36.2	86	86	20	114	66	6		0	0	0	0	1	0	1	0	0	0	2		0	0		0	0	0	0	0	0	0	0	0	1	0	0	0	0	1	1	0	0
1	27	0	74	2017-06-20	2017-06-26	6		36.3	86	86	20	109	67	15		0	0	0	0	0	0	0	0	0	0	0		0	0		0	0	0	0	0	0	0	0	0	0	0	0	0	0	0	0	0	0
1	67	0	49.5	2017-05-25	2017-06-20	26		36.5	86	86	20	120	76	14		0	1	0	0	0	0	0	0	0	0	0		0	0		0	0	0	0	0	0	8	0	0	1	0	0	0	0	1	0	0	0
1	58	0	75	2016-09-18	2016-09-28	10		36.5	86	86	20	140	81	8		0	0	0	0	0	0	0	0	0	0	1		0	0		1	1	0	0	0	0	0	0	0	0	0	0	0	0	0	0	0	0
0	42	0	72	2017-02-28	2017-03-07	7		36.5	86	86	20	112	74	15		0	1	0	0	0	0	0	0	0	0	0		0	0		0	0	0	0	0	0	0	0	0	1	0	0	0	0	0	0	0	0
1	51	0	85	2015-12-02	2015-12-09	7		36.6	86	86	20	145	97	15		0	1	1	0	0	0	1	0	0	0	0		0	0		1	0	0	0	0	0	0	0	0	0	0	0	0	0	0	0	0	0
1	66	0	75	2016-09-13	2016-10-09	26		36.8	86	86	20	145	87	6		0	0	0	0	0	0	0	0	0	0	1		0	0		1	1	0	0	0	0	9	0	0	1	0	0	0	0	0	1	0	0
0	62	0	45.5	2014-03-13	2014-04-17	35		36.8	86	86	20	106	65	60		0	1	0	0	0	0	1	0	0	0	0		0	0		0	0	0	0	0	0	8	0	0	1	1	0	0	0	1	1	0	0	0
1	60	0	65	2014-09-03	2014-09-09	6		36.8	86	86	20	124	77	15		0	1	0	0	0	0	0	0	0	0	0		0	0		0	0	0	0	0	0	8	0	0	0	0	0	0	0	0	0	0	0
1	46	1.72	70	2014-05-01	2014-06-14	44		36.8	86	86	20	126	77	7		0	0	0	0	0	0	0	0	0	0	1		0	1		0	1	0	0	0	0	0	0	0	1	0	0	0	0	0	1	0	0
1	29	0	60	2015-10-10	2015-10-18	8		36.9	86	86	20	125	76	10		0	0	0	0	0	0	0	0	0	0	0		0	0		0	0	0	0	0	0	0	0	0	0	0	0	0	0	0	0	0	0
0	53	0	46	2016-01-22	2016-02-02	11		37	86	86	20	87	55	15		0	0	0	0	0	0	0	0	0	0	0		0	0		0	0	0	0	0	0	2,5	0	0	0	0	0	0	0	0	0	0	0	1
1	70	0	60	2015-04-05	2015-04-14	9		37.3	86	86	20	107	55	7		0	1	0	0	0	0	0	0	0	0	0		0	0		0	0	0	0	0	0	0	0	0	0	0	0	0	0	0	0	0	0
1	54	0	-	2013-04-14	2013-04-26	12		38.3	86	86	20	141	83	10		0	0	0	0	0	0	0	0	0	0	0		0	0		0	0	0	0	0	0	0	0	0	1	0	0	0	0	0	0	0	0
0	60	0	-	2016-08-05	2016-08-25	20		38.8	86	86	20	145	79	4		0	1	1	0	0	0	1	0	0	0	1		0	1		0	1	2	0	0	0	0	0	0	1	0	0	0	0	0	0	0	0	0
1	50	0	76	2012-03-28	2012-04-19	22		36.7	87	87	20	133	79	15		0	0	0	0	0	0	1	0	0	0	1		0	0		1	1	0	0	0	0	0	0	0	1	0	0	0	0	0	0	0	0	0
0	53	0	61	2016-03-14	2016-04-05	22		36	88	88	20	121	79	8		0	0	0	0	0	1	1	0	1	0	0		0	0		0	0	0	0	0	0	0	0	0	1	0	0	0	0	1	1	0	0
1	52	0	69	2017-01-16	2017-01-23	7		36	88	88	20	119	88	7		0	1	0	0	0	0	0	0	0	0	0		0	0		0	0	0	0	0	0	0	0	0	1	0	0	0	0	0	0	0	0	1
1	76	0	-	2017-02-02	2017-02-12	10		36.3	88	88	20	113	69	15		0	1	0	0	0	0	0	0	0	0	0		0	0		0	0	0	0	0	0	0	0	0	1	0	0	0	0	0	1	0	0	1
0	75	1.5	55	2013-04-11	2013-04-15	4		36.4	88	88	20	124	72	30		0	1	1	0	0	0	1	0	0	0	0		0	0		0	0	0	0	0	0	0	0	0	0	0	0	0	0	0	1	0	0
1	34	0	50	2012-03-19	2012-03-24	5		36.5	88	88	18	102	75	10		0	1	0	0	0	0	0	0	0	0	0		0	0		0	0	0	0	0	0	0	0	0	0	0	0	0	0	0	0	0	0
1	49	0	53	2017-08-14	2017-08-23	9		36.6	88	88	20	127	92	150		0	1	0	0	0	0	0	0	0	0	0		0	0		0	0	0	0	0	0	0	0	0	0	0	0	0	0	0	0	0	0
1	41	0	-	2013-01-04	2013-01-15	11		36.6	88	88	20	122	89	5		0	0	0	0	0	0	0	0	0	0	0		0	0		0	0	0	0	0	0	0	0	0	1	0	0	0	0	0	0	0	0
1	59	0	80	2015-08-14	2015-08-15	1		36.7	88	88	20	130	84	60		0	1	0	0	0	0	0	0	0	0	0		0	0		0	0	0	0	0	0	0	0	0	0	0	0	0	0	0	0	0	0
1	51	0	81	2013-01-09	2013-01-20	11		36.7	88	88	24	123	86	15		0	0	0	0	0	0	0	0	0	0	1		0	0		0	1	2	0	0	0	0	0	0	0	0	0	0	0	0	0	0	0
1	39	0	75	2012-04-13	2012-04-25	12		36.7	88	88	20	116	78	9		0	1	0	0	0	1	1	0	0	0	0		0	0		0	0	0	0	0	0	0	0	0	1	0	0	0	0	1	1	0	0	0
1	27	0	70	2016-10-09	2016-10-14	5		36.7	88	88	18	99	76	15		0	1	0	0	0	0	1	0	0	0	1		0	0		0	1	0	0	0	0	0	0	0	1	0	0	0	0	0	0	0	0
1	66	0	52	2012-05-31	2012-06-06	6		36.8	88	88	24	114	76	20		0	0	0	0	0	0	1	0	0	0	1		0	1		0	1	1	0	1	0	0	0	0	1	0	0	0	0	1	1	0	0	0
1	28	0	85	2016-08-22	2016-08-26	4		36.8	88	88	16	136	78	20		0	1	0	0	0	1	1	0	1	0	0		0	0		0	0	0	0	0	0	0	0	0	1	0	0	0	0	0	0	0	0
1	48	0	55	2017-06-28	2017-07-06	8		36.9	88	88	22	123	86	15		0	0	0	0	0	0	0	0	0	0	0		0	0		0	0	0	0	0	0	0	0	0	0	0	0	0	0	0	1	0	0
1	42	0	75	2015-08-03	2015-08-04	1		36.9	88	88	20	108	66	5		0	1	1	0	0	0	1	0	0	0	0		0	0		0	0	0	0	0	0	8	0	0	1	0	0	0	0	0	0	0	0
1	14	0	50	2017-07-23	2017-07-28	5		36.9	88	88	20	116	68	10		0	1	0	0	0	0	0	0	0	0	0		0	0		0	0	0	0	0	0	0	0	0	0	0	0	0	0	0	0	0	0
0	65	0	56	2016-08-24	2016-09-28	35		37	88	88	20	134	75	15		0	1	1	0	0	1	1	0	0	0	0		0	0		1	0	0	0	0	1	8	0	0	1	1	0	0	0	1	1	0	0
1	41	0	91	2011-12-03	2011-12-09	6		37	88	88	20	121	64	10		0	0	0	0	0	0	0	0	0	0	0		0	0		0	0	0	0	0	0	0	0	0	0	0	0	0	0	0	0	0	0
0	66	0	56	2016-06-17	2016-06-24	7		37.1	88	88	20	107	69	30		0	1	0	0	0	0	0	0	0	0	2		0	0		0	0	0	0	0	0	0	0	0	0	0	0	0	0	0	0	0	0
0	60	0	47	2013-02-18	2013-03-04	14		37.1	88	88	20	122	85	30		0	1	0	0	0	0	1	0	0	0	1		0	0		0	1	1	0	0	0	0	0	0	0	0	0	0	0	0	0	0	0
1	52	0	64	2014-06-05	2014-06-18	13		37.1	88	88	20	90	56	7		0	1	0	0	0	0	0	0	0	0	0		0	0		0	0	0	0	0	0	0	0	0	0	0	0	0	0	0	1	0	0	1
0	65	0	-	2013-02-11	2013-02-12	1		37.2	88	88	24	177	99	4		0	0	0	1	0	0	1	0	0	0	1		0	0		0	1	0	0	0	0	0	0	0	0	0	0	0	0	0	0	0	0
0	64	0	-	2016-01-06	2016-01-21	15		37.2	88	88	18	103	65	7		0	0	0	0	0	0	1	1	1	0	0		0	0		0	0	0	0	0	0	3	0	0	1	0	0	0	0	1	0	0	0
1	50	1.69	-	2014-02-15	2014-03-01	14		37.6	88	88	20	113	72	3		0	0	0	0	0	0	0	0	0	0	0		0	0		0	0	0	0	0	0	0	0	0	1	0	0	0	0	0	0	0	0
0	72	0	-	2015-05-06	2015-05-12	6		38	88	88	20	137	74	30		0	0	0	0	0	0	0	0	0	0	0		0	0		1	0	0	0	0	0	0	0	0	1	1	0	0	0	1	1	0	0
1	55	1.7	61	2016-05-30	2016-06-06	7		41.2	118	118	20	133	83	12		0	0	0	0	0	0	0	0	0	0	1		0	0		0	1	1	1	0	0	0	0	0	1	0	0	0	0	0	0	0	0
1	60	0	52	2014-06-24	2014-07-15	21		36	90	90	21	124	67	10		0	0	0	0	0	0	1	0	1	0	0		0	0		0	0	0	0	0	0	3	1	0	1	0	0	0	0	0	0	0	0
1	59	0	65	2013-04-14	2013-04-23	9		36	90	90	20	83	55	15		0	1	1	0	0	0	1	0	0	0	0		0	0		0	0	0	0	0	0	0	0	0	1	0	0	0	0	0	1	1	0
0	54	0	44	2013-12-18	2014-01-20	33		36.2	90	90	20	131	74	3		0	0	1	0	0	0	0	1	0	0	0		0	0		0	0	0	0	0	0	0	0	0	1	0	0	0	0	0	1	0	0
1	70	0	60	2015-01-10	2015-01-26	16		36.5	90	90	20	99	67	10		0	1	0	0	0	0	0	0	0	0	0		0	0		0	0	0	0	0	0	0	0	0	0	0	0	0	0	0	0	0	0	1
1	63	0	65.7	2021-05-06	2021-05-18	12		36.5	90	90	20	108	78	7		1	1	1	0	0	0	1	0	0	0	1		0	1		0	1	3	1	0	0	0	0	0	1	0	0	0	0	0	1	0	0
0	46	0	66	2014-09-26	2014-10-28	32		36.8	90	90	20	124	72	10		0	1	0	0	0	0	0	0	0	0	0		0	0		0	0	0	0	0	0	0	0	0	0	0	0	0	0	0	0	0	0
1	38	0	-	2012-03-22	2012-03-30	8		36.8	90	90	20	113	92	7		0	1	0	0	0	0	0	0	0	0	0		0	0		0	0	0	0	0	0	0	0	0	0	0	0	0	0	0	0	0	0
0	62	0	68.5	2015-07-29	2015-08-26	28		37	90	90	24	132	71	8		1	1	1	0	0	0	1	0	1	0	0		0	0		0	0	0	0	0	0	8	0	0	1	0	0	0	0	0	0	0	0
1	55	1.66	74	2012-12-21	2013-01-05	15		38	90	90	20	126	72	8		0	1	0	0	0	0	1	0	0	0	0		0	0		0	0	0	0	0	0	1	0	0	0	0	0	0	0	0	1	0	0
1	48	0	59	2013-08-19	2013-09-02	14		38.5	90	90	20	117	69	2		0	0	0	0	0	0	0	0	0	0	0		0	0		0	0	0	0	0	0	0	0	0	0	0	0	0	0	0	1	0	0
1	37	0	60	2015-09-07	2015-09-10	3		39.1	90	90	20	124	49	1		0	0	0	0	0	0	1	0	1	0	0		0	0		0	0	0	0	0	0	0	0	0	1	0	0	0	0	0	1	0	0
0	68	0	-	2016-04-05	2016-04-12	7		36.3	92	92	20	144	78	7		1	1	1	0	0	0	0	0	0	0	0		0	0		1	0	0	0	0	0	0	1	0	0	0	0	0	0	0	0	0	0	0
1	58	0	85	2016-03-28	2016-04-29	32		36.3	92	92	20	155	83	7		0	0	0	0	0	0	0	0	0	0	0		0	0		0	0	0	0	0	0	0	0	0	1	0	0	0	0	0	0	0	0
1	60	0	80	2014-08-20	2014-09-12	23		36.5	92	92	20	118	75	5		0	1	0	0	0	0	0	0	0	0	0		0	0		0	0	0	0	0	0	0	0	0	1	0	0	0	0	0	0	0	0
0	51	0	-	2014-10-26	2014-10-31	5		36.7	92	92	20	124	74	15		0	1	0	0	0	0	0	0	0	0	1		0	0		0	1	1	0	0	0	0	0	0	0	0	0	0	0	0	0	0	0
1	58	0	-	2014-12-04	2014-12-15	11		36.8	92	92	26	119	77	3		0	0	0	0	0	0	1	0	1	0	0		0	0		1	0	0	0	0	0	7	0	0	1	1	0	0	0	0	1	0	0
1	68	0	65.5	2013-05-13	2013-05-22	9		36.9	92	92	20	149	103	14		0	0	0	0	0	0	1	0	1	0	0		0	0		0	0	0	0	0	1	0	0	0	1	0	0	0	0	1	0	0	0
1	48	0	80.5	2015-07-08	2015-07-24	16		37	92	92	20	125	73	20		1	0	1	0	0	0	1	0	0	0	0		0	0		1	0	0	0	0	0	2	0	0	1	0	0	0	0	0	0	0	0
0	42	0	-	2016-07-15	2016-07-26	11		38	92	92	18	95	62	15		0	0	1	0	0	0	0	0	0	0	0		0	0		0	0	0	0	0	0	0	0	0	1	0	0	0	0	0	0	0	0	1
0	75	0	54	2016-09-07	2016-09-16	9		38.2	92	92	18	120	70	10		0	0	0	0	0	0	0	0	0	0	0		0	0		0	0	0	0	0	0	8	0	0	1	0	0	0	0	1	0	0	0
0	47	0	60	2014-10-13	2014-10-25	12		38.3	92	92	20	128	78	30		0	1	0	0	0	0	0	0	0	0	0		0	0		0	0	0	0	0	0	0	0	0	0	0	0	0	0	0	1	0	0
1	60	0	74.5	2016-03-11	2016-03-25	14		39.4	92	92	20	128	68	30		0	0	0	0	0	1	1	0	0	0	0		0	0		0	0	0	0	0	0	0	1	0	1	0	0	0	0	0	0	0	0
0	63	0	-	2015-06-03	2015-06-19	16		36.2	94	94	20	111	71	2		0	0	0	1	1	0	1	0	0	0	1		1	1		1	1	0	0	0	0	0	0	0	1	1	1	0	0	1	1	0	0
1	60	0	-	2016-08-04	2016-08-13	9		36.4	94	94	20	65	42	30		0	1	1	0	0	0	0	0	0	0	0		0	0		0	0	0	0	0	0	0	0	0	1	0	0	0	0	0	0	1	0
1	52	0	75	2012-11-07	2012-12-01	24		36.5	94	94	20	106	72	7		0	0	1	0	0	0	0	0	0	0	0		0	0		0	0	0	0	0	0	0	1	0	0	0	0	0	0	0	0	0	0	0
0	51	0	43	2014-11-08	2014-11-19	11		36.5	94	94	20	137	83	30		0	1	0	0	0	0	0	0	0	0	1		0	0		0	1	1	0	0	0	0	0	0	0	0	0	0	0	0	0	0	0
1	42	0	65	2013-04-16	2013-05-01	15		36.9	94	94	20	137	91	30		0	1	0	0	0	0	0	0	0	0	0		0	0		0	0	0	0	1	0	0	0	0	0	0	0	0	0	0	0	0	0	0
1	45	0	69	2014-01-13	2014-02-01	19		37.1	94	94	20	145	95	5		0	0	0	0	0	0	0	0	0	0	2		0	1		0	0	0	0	0	0	3	1	0	1	0	0	0	0	0	0	0	0	1
0	52	0	59	2015-02-09	2015-02-14	5		37.2	94	94	20	98	64	30		0	1	0	0	0	0	0	0	0	0	0		0	0		0	0	0	0	0	0	0	0	0	1	0	0	0	0	0	0	0	0
1	56	0	-	2015-04-14	2015-04-25	11		37.5	95	95	12	128	86	6		1	1	0	0	0	0	1	1	1	1	1		0	0		1	1	0	0	0	0	0	0	0	1	1	1	1	1	1	0	1	0
1	47	1.65	74.7	2014-02-14	2014-03-11	25		36.2	96	96	20	133	89	20		0	0	0	0	0	0	0	0	0	0	0		0	0		0	0	0	0	0	0	2,6	0	0	1	0	0	0	0	0	1	0	0
1	39	1.72	68	2021-04-14	2021-05-01	17		36.3	96	96	20	106	80	4		1	1	1	1	0	0	1	0	0	0	2		0	1		0	0	0	0	0	0	1	0	0	1	0	0	0	0	0	0	0	0	0
1	60	0	75	2016-11-03	2016-11-18	15		36.5	96	96	20	120	74	4		0	1	0	0	0	0	0	0	0	0	0		0	0		0	0	0	0	0	0	0	0	0	0	0	0	0	0	0	0	0	0
1	50	0	-	2015-03-12	2015-04-03	22		36.5	96	96	20	159	88	14		0	1	1	1	0	0	1	0	0	0	1		0	1		0	1	1	0	1	0	0	0	0	1	0	0	0	0	1	0	0	0
1	45	0	76	2013-02-04	2013-02-06	2		36.5	96	96	20	117	74	30		0	1	1	0	0	0	0	0	0	0	0		0	0		1	0	0	0	0	0	2	0	0	0	0	0	0	0	0	0	0	0	0
1	55	0	60	2011-12-15	2012-01-02	18		36.7	96	96	20	141	91	30		0	1	0	0	0	0	0	0	0	0	0		0	0		0	0	0	0	0	0	0	0	0	0	0	0	0	0	0	1	0	0
1	29	0	70	2017-03-07	2017-04-02	26		36.7	96	96	20	133	97	30		0	1	0	0	0	0	0	0	0	0	0		0	0		0	0	0	0	0	0	0	0	0	1	0	0	0	0	0	0	0	0
0	79	0	66	2017-04-07	2017-04-17	10		36.8	96	96	24	154	86	30		0	1	1	0	0	0	1	0	1	0	1		0	0		1	1	0	0	0	0	0	0	0	0	0	0	0	0	0	0	0	0
1	77	1.65	-	2015-01-19	2015-02-06	18		36.8	96	96	20	149	77	3		0	0	0	0	0	0	0	0	0	0	1		0	0		1	1	0	0	0	0	0	0	0	1	1	0	0	0	1	1	0	0
1	38	1.76	86	2017-12-22	2018-01-15	24		36.8	96	96	20	128	82	40		0	0	0	0	0	1	1	0	0	0	2		0	0		0	0	0	0	0	0	0	0	0	1	0	0	0	0	1	1	0	0	0
1	61	0	76	2016-01-17	2016-11-08	296		37	96	96	20	130	76	14		0	0	0	0	0	0	1	0	0	0	0		0	0		0	0	0	0	0	0	8	0	0	1	0	0	0	0	1	1	0	0
1	60	0	80	2015-09-06	2015-09-12	6		37.3	96	96	20	154	90	4		0	0	0	0	0	0	0	0	0	0	1		0	0		1	1	0	0	0	0	0	0	0	1	0	0	0	0	0	0	0	0
1	48	0	81	2014-04-01	2014-04-14	13		37.4	96	96	22	138	94	2		0	1	0	0	0	0	0	0	0	0	2		0	1		1	0	0	0	0	0	0	0	0	1	0	0	0	0	0	0	0	0	1
1	35	0	45	2012-01-05	2012-01-17	12		37.4	96	96	20	110	75	20		0	1	0	0	1	0	0	0	0	0	0		0	0		0	0	0	0	0	0	0	0	0	0	0	0	0	0	0	0	0	0
1	62	0	-	2017-04-10	2017-04-25	15		37.6	96	96	16	92	53	3		0	1	0	0	0	0	1	0	0	0	0		0	0		0	0	0	0	0	0	0	1	0	1	0	0	0	0	1	1	0	0
1	68	0	60	2012-12-24	2013-01-05	12		37.7	96	96	20	122	78	1		0	1	1	0	0	0	0	0	0	0	0		0	0		0	0	0	0	0	0	0	0	0	0	0	0	0	0	0	0	0	0
0	51	0	72	2017-01-07	2017-01-26	19		35.6	98	98	20	133	85	20		0	1	0	0	0	0	1	0	0	0	1		0	1		0	1	0	0	0	0	1	0	0	0	0	0	0	0	0	0	0	0
1	17	1.72	-	2017-08-06	2017-08-28	22		36.1	98	98	21	110	74	15		0	0	0	0	0	0	1	0	0	0	2		0	1		0	0	0	0	0	0	0	0	0	1	0	0	0	0	0	1	0	0	0
1	49	0	65	2015-06-09	2015-06-29	20		36.2	98	98	20	120	66	30		0	0	0	0	0	0	0	0	0	0	1		1	1		0	1	0	0	0	0	0	0	0	0	0	0	0	0	0	0	0	0
1	66	1.66	56	2017-11-27	2018-01-19	53		36.8	98	98	22	81	64	30		0	1	0	0	0	0	0	0	0	0	2		0	0		0	0	0	0	0	0	0	0	0	1	0	0	0	0	0	1	0	0
1	53	0	68	2014-08-02	2014-08-09	7		36.8	98	98	22	119	77	15		0	1	0	0	0	0	0	0	0	0	0		0	0		0	0	0	0	0	0	0	0	0	0	0	0	0	0	0	0	0	0
0	50	0	50	2014-09-24	2014-10-11	17		36.8	98	98	20	104	68	7		0	1	0	0	0	0	0	0	0	0	1		0	0		0	1	0	0	0	0	0	0	0	1	0	0	0	0	0	1	0	0	1
0	65	0	-	2016-09-22	2016-10-14	22		37	98	98	20	189	93	20		0	0	0	0	0	0	0	0	0	1	2		0	1		0	0	0	0	0	0	0	0	0	0	0	0	0	0	0	1	0	0
1	38	0	59	2014-04-05	2014-04-08	3		37.7	98	98	21	101	68	15		1	1	1	0	0	1	1	0	0	0	0		0	0		0	0	0	0	0	0	0	0	0	0	0	0	0	0	0	0	0	0
1	53	0	74	2015-08-20	2015-08-26	6		36.2	100	100	20	107	71	240		0	0	0	0	0	0	1	0	0	0	0		0	0		0	0	0	0	0	0	8	0	1	0	0	0	0	0	0	0	0	0
0	65	0	75	2018-02-22	2018-03-13	19		36.3	100	100	26	122	84	7		0	0	0	0	0	0	0	0	0	0	2		0	0		0	0	0	0	0	0	0	0	0	0	0	0	0	0	0	0	0	0
1	43	0	71	2014-08-21	2014-09-03	13		36.5	100	100	20	108	79	3		0	1	0	0	0	0	0	0	0	0	0		0	0		0	0	0	0	0	0	0	0	0	0	0	0	0	0	0	0	0	0
1	79	0	61	2011-12-12	2012-01-10	29		36.6	100	100	18	123	70	30		0	0	0	0	0	0	0	0	0	0	1		0	0		0	1	0	0	0	0	0	0	0	1	0	0	0	0	1	1	0	0
1	39	0	-	2015-03-09	2015-04-03	25		36.7	100	100	21	111	72	30		0	0	0	0	0	0	0	0	0	0	0		0	0		0	0	0	0	1	0	9	1	1	0	0	0	0	0	0	0	0	0
1	53	0	70	2016-08-25	2016-09-27	33		36.8	100	100	20	109	75	7		0	0	0	0	0	0	1	0	1	0	0		0	0		1	0	0	0	0	0	0	0	0	1	0	0	0	0	0	0	0	0
1	46	0	66.5	2014-09-19	2014-10-03	14		36.8	100	100	20	112	66	90		0	1	0	0	0	0	1	0	0	0	0		0	0		0	0	0	0	0	0	8	0	0	0	0	0	0	0	0	0	0	0
1	57	0	65	2016-03-21	2016-03-24	3		37	100	100	20	138	89	10		0	1	0	0	0	0	0	0	0	0	0		0	0		0	0	0	0	0	0	0	0	0	1	0	0	0	0	0	1	0	0	1
1	40	0	64	2013-11-26	2013-12-12	16		37.2	100	100	20	117	81	7		0	1	0	0	0	0	0	0	0	0	0		0	0		0	0	0	0	0	0	0	0	0	1	0	0	0	0	0	0	0	0
0	56	0	54	2011-12-12	2012-01-08	27		38.3	100	100	20	107	68	14		0	1	0	0	0	0	0	0	0	0	0		0	0		0	0	0	0	0	0	8	0	0	1	0	0	0	0	0	0	0	0
0	43	0	47	2013-02-14	2013-03-20	34		38.5	100	100	20	105	70	10		0	1	0	0	0	0	0	0	0	0	0		0	0		0	0	0	0	0	0	0	0	0	1	0	0	0	0	0	0	0	0
1	57	0	-	2017-02-05	2017-02-21	16		36	102	102	19	94	56	10		0	1	0	0	0	0	1	0	0	0	0		0	0		0	0	0	0	0	0	0	0	0	1	1	0	1	1	1	1	1	0
1	43	0	61	2015-03-22	2015-03-25	3		36.4	102	102	24	102	63	7		0	1	1	0	0	0	0	0	0	0	0		0	0		0	0	0	0	0	0	0	0	0	1	0	0	0	0	0	0	0	0
1	81	0	44	2013-04-08	2013-04-26	18		36.7	102	102	20	120	80	150		0	1	1	0	0	0	1	0	0	0	0		0	0		0	0	0	0	1	0	7	0	0	1	0	0	0	0	1	0	0	0	0
0	59	0	-	2014-06-11	2014-06-18	7		39.1	102	102	20	112	70	7		0	1	1	0	0	0	0	0	0	0	1		0	0		1	1	0	0	0	0	0	0	0	1	0	1	0	0	1	1	0	0
1	38	0	63	2017-05-14	2017-05-17	3		36.3	104	104	20	76	50	7		0	0	0	0	0	0	1	0	0	1	1		0	1		0	1	2	0	0	0	0	0	0	1	1	1	1	0	1	1	1	0	0
1	51	0	-	2012-03-29	2012-04-05	7		36.5	104	104	20	98	75	15		0	0	0	0	0	0	1	0	0	0	0		0	0		0	0	0	0	0	0	0	0	0	0	0	0	0	0	0	0	0	0
1	41	0	75	2017-12-19	2018-01-29	41		36.5	104	104	20	109	65	60		0	1	0	0	0	0	0	0	0	0	0		0	0		0	0	0	0	0	0	0	0	0	0	0	0	0	0	0	0	0	0
0	67	1.57	52	2015-01-31	2015-02-11	11		36.8	104	104	20	92	57	6		0	0	0	0	0	0	0	0	0	0	1		0	0		0	1	2	0	0	0	8	0	0	1	1	1	0	0	1	1	0	0
1	48	0	80	2016-02-12	2016-03-07	24		38.9	104	104	20	103	74	30		0	0	0	0	0	0	1	0	0	0	1		0	0		0	1	1	0	0	0	0	0	0	0	0	0	0	0	0	0	0	0
1	41	0	54	2015-06-02	2015-06-26	24		39.2	104	104	20	103	74	30		0	0	0	0	0	0	1	0	1	0	0		0	0		0	0	0	0	0	0	2,8	0	0	0	0	0	0	0	0	0	0	0
0	26	0	-	2012-02-04	2012-03-14	39		37.9	105	105	20	127	67	8		0	0	0	0	0	0	1	0	0	0	2		0	1		0	0	0	0	0	0	0	0	0	0	0	0	0	0	0	0	0	0
1	31	0	82	2014-05-08	2014-05-13	5		36.3	106	106	20	119	71	4		0	0	0	0	0	0	0	0	0	0	0		0	0		0	0	0	0	0	0	0	0	0	0	0	0	0	0	0	0	0	0
1	24	0	70	2017-01-20	2017-02-08	19		36.5	106	106	20	124	78	10		0	1	0	0	0	0	0	0	0	0	0		0	0		0	0	0	0	0	0	0	0	0	1	0	0	0	0	0	0	0	0	0
0	51	0	45	2017-10-25	2017-11-08	14		36.7	106	106	16	118	85	8		0	1	0	0	0	0	0	0	0	0	2		0	1		0	0	0	0	0	0	0	1	0	1	0	0	0	0	0	1	0	0
0	63	0	-	2012-01-25	2012-02-07	13		36.8	106	106	24	97	72	10		0	1	0	0	0	0	0	0	0	0	0		0	0		0	0	0	0	0	0	8	0	0	0	0	0	0	0	0	0	0	0
1	51	0	60.5	2017-06-23	2017-07-24	31		36.8	106	106	18	118	84	3		0	1	1	0	0	0	1	0	0	0	0		0	0		0	0	0	0	0	0	8	0	0	1	0	0	0	0	1	0	0	0
1	49	0	-	2014-08-25	2014-09-01	7		38	106	106	20	103	63	10		1	0	0	0	0	0	0	0	0	0	0		0	0		0	0	0	0	0	0	8	0	0	1	0	0	0	0	1	1	1	0
1	31	0	-	2017-08-02	2017-08-16	14		38.5	106	106	20	127	87	3		0	1	0	0	0	0	0	0	0	0	0		0	0		0	0	0	0	0	0	0	0	0	1	0	0	0	0	1	0	0	0
0	52	0	40	2015-06-30	2015-07-13	13		36.5	108	108	24	98	60	30		0	1	1	0	0	0	1	0	0	0	0		0	0		0	0	0	0	0	0	8	0	0	1	0	0	0	0	0	0	0	0
1	76	1.6	50	2018-04-23	2018-05-28	35		36.7	108	108	20	110	70	20		0	1	0	0	0	0	0	0	0	0	0		0	0		1	0	0	0	0	0	5,7	0	0	0	0	0	0	0	0	1	0	0	1
0	43	1.6	81.5	2013-10-19	2013-11-16	28		36.7	108	108	20	110	74	6		0	0	0	0	0	0	0	0	0	0	1		0	0		0	1	0	0	1	0	0	0	0	1	0	0	0	0	1	1	0	0
1	38	0	74	2017-06-16	2017-06-23	7		36.8	108	108	22	118	68	4		0	0	0	0	0	1	0	0	0	0	1		0	0		0	1	0	0	0	0	0	0	0	0	0	0	0	0	0	0	0	0
0	34	0	72.5	2017-02-15	2017-03-19	32		38	108	108	18	122	88	7		0	1	1	0	0	0	1	0	0	0	0		0	0		0	0	0	0	0	0	0	1	0	0	0	0	0	0	0	1	0	0	1
1	33	0	89	2017-08-21	2017-08-21	0		36	110	110	20	104	69	15		0	0	0	0	0	1	1	0	0	0	0		0	0		0	0	0	0	0	0	0	0	0	1	0	0	0	0	0	0	0	0
0	69	0	60	2013-11-27	2013-12-28	31		36.1	110	110	22	110	79	10		0	1	0	0	0	0	1	0	0	0	0		0	0		0	0	0	0	0	0	0	0	0	1	1	0	0	0	0	1	0	0	1
1	59	0	74	2017-10-25	2017-11-06	12		36.3	110	110	20	120	78	10		0	1	0	0	0	0	0	0	0	0	1		0	0		1	1	0	0	0	0	0	0	0	0	0	0	0	0	0	0	0	0	1
0	48	0	68	2018-02-13	2018-03-23	38		36.5	110	110	20	120	70	3		0	0	0	0	1	0	0	0	0	0	0		0	0		0	0	0	0	0	0	0	0	0	0	0	0	0	0	0	1	0	0
1	62	0	75	2016-09-05	2016-09-13	8		36.6	110	110	20	110	71	2		0	1	0	0	0	0	0	0	0	0	1		0	0		1	1	3	0	0	0	0	0	0	0	0	0	0	0	0	0	0	0	1
1	38	0	69	2018-02-05	2018-03-23	46		36.9	112	112	20	92	63	5		1	1	0	0	0	0	0	0	0	0	0		0	0		0	0	0	0	1	0	0	0	0	1	1	1	0	0	1	1	0	0	0
1	74	0	-	2017-11-03	2017-11-17	14		37	112	112	22	147	75	30		0	1	1	0	0	0	1	0	0	0	0		0	0		1	0	0	0	0	0	0	0	0	1	0	0	0	0	1	1	0	0	0
1	20	0	63	2011-12-17	2011-01-10	#NUM!		39.2	113	113	21	121	70	2		0	1	0	0	0	0	1	0	0	0	0		0	0		0	0	0	0	0	0	2,3	0	0	1	0	0	0	0	1	1	0	0
0	55	0	48	2013-10-22	2013-11-08	17		36.4	114	114	22	106	80	90		0	0	0	0	0	0	0	0	0	0	0		0	0		0	0	0	0	0	0	0	0	0	0	0	0	0	0	0	0	0	0
1	58	0	-	2013-01-16	2013-04-07	81		39.4	114	114	20	135	87	15		0	0	0	0	0	0	0	0	0	0	1		0	0		1	1	2	0	0	0	0	0	0	0	0	0	0	0	0	0	0	0
0	51	0	-	2013-09-29	2013-10-15	16		36	116	116	22	101	57	20		0	0	0	0	0	0	0	0	0	0	0		0	0		0	0	0	0	0	0	8	0	0	1	0	0	0	0	0	1	1	0
1	45	1.6	50	2014-04-17	2014-05-05	18		36.2	118	118	22	123	81	15		1	0	0	0	0	0	0	0	0	0	0		0	0		0	0	0	0	0	0	0	0	0	1	0	0	0	0	1	0	0	0	0
1	50	0	79	2015-01-13	2015-01-21	8		36.3	118	118	20	101	72	15		0	0	0	0	0	0	0	0	0	0	1		0	0		0	1	0	0	0	0	0	0	0	0	0	0	0	0	0	0	0	0
1	50	0	-	2013-02-14	2013-03-19	33		37.9	118	118	20	101	73	20		0	0	0	1	1	0	0	0	0	0	0		0	0		0	0	0	0	0	0	0	0	0	1	0	0	0	0	1	1	0	0	1
1	32	0	-	2014-03-31	2014-04-02	2		38.1	118	118	32	128	80	4		0	1	0	0	0	0	1	0	0	0	2		0	1		0	0	0	0	0	0	0	0	0	1	0	0	0	0	0	0	0	0
0	61	0	39	2012-07-09	2012-07-15	6		38.6	118	118	20	116	68	7		0	1	0	0	0	0	1	0	0	0	0		0	0		0	0	0	0	0	0	8	0	0	1	0	0	0	0	1	1	0	0	0
1	47	0	48	2014-02-04	2014-02-11	7		36.1	120	120	22	115	86	7		0	1	0	0	0	0	1	0	0	0	0		0	0		0	0	0	0	0	0	0	0	0	0	0	0	0	0	0	0	0	0
1	64	0	-	2018-02-22	2018-03-07	13		36.5	120	120	22	118	70	15		0	0	0	0	0	1	1	0	0	0	1		0	1		0	1	2	0	0	0	0	0	0	1	1	1	0	0	1	1	0	0	0
1	51	0	66	2013-02-14	2013-03-01	15		37	120	120	21	115	78	30		0	0	0	0	0	0	1	0	0	0	2		0	1		0	0	0	0	0	0	0	0	0	0	0	0	0	0	0	0	0	0
1	51	0	80.5	2011-11-01	2011-11-28	27		37.2	120	120	20	122	85	14		0	0	0	1	0	1	1	0	0	0	1		0	0		0	1	0	0	1	0	0	0	0	1	0	0	0	0	1	1	0	0
0	63	0	-	41876	41879	3		38.6	120	120	28	125	57	4		0	1	0	0	0	0	0	0	0	0	1		0	1		1	1	0	0	0	0	0	0	0	1	0	0	0	0	1	0	0	0	1
1	45	0	-	2013-09-21	2013-10-18	27		36.6	122	122	22	105	68	10		0	0	0	0	0	1	1	0	0	0	0		0	0		0	0	0	0	0	0	0	0	0	1	0	0	0	0	0	1	0	0
1	67	0	75	2016-01-20	2016-02-19	30		38.1	122	122	20	140	77	20		1	1	0	0	0	0	1	0	1	0	0		0	0		0	0	0	0	0	0	0	0	0	0	0	0	0	0	0	0	0	0
1	59	1.73	-	2014-03-18	2014-04-23	36		39.8	122	122	26	110	70	3		0	0	0	0	0	0	0	0	0	0	0		0	0		0	0	0	0	0	0	7	1	0	1	0	0	0	0	1	1	0	0
1	34	0	-	41860	41866	6		38.3	124	124	20	118	65	60		1	1	1	1	0	1	1	0	1	0	2		0	0		0	0	0	0	0	0	0	0	0	0	0	0	0	0	0	0	0	0	1
1	46	0	81	2016-07-23	2016-08-25	33		36	126	126	26	151	104	3		0	0	0	0	0	0	0	0	0	0	2		0	0		0	0	0	0	0	0	0	0	0	0	0	0	0	0	0	0	0	0	1
1	59	0	55	2013-06-04	2013-06-22	18		37.9	128	108	20	171	106	10		1	1	0	0	0	0	1	0	0	0	0		0	0		1	0	0	0	0	0	0	1	0	1	1	0	1	1	1	1	0	0
1	29	0	-	2017-01-19	2017-02-27	39		36.6	130	130	20	122	90	8		1	1	1	0	0	0	1	0	0	0	0		0	0		0	0	0	0	0	0	0	0	0	1	0	0	0	0	1	1	0	0	0
1	53	0	84	2018-03-08	2018-04-03	26		38.1	130	130	24	115	90	15		0	1	0	0	0	0	1	0	0	0	2		0	1		1	0	0	0	0	0	0	0	0	1	1	1	0	0	1	1	0	0	1
0	80	0	-	2013-07-08	2013-08-06	29		38.3	130	130	20	101	55	60		0	0	0	0	0	0	0	0	0	0	0		0	0		0	0	0	0	0	0	4,7	0	0	0	0	0	0	0	0	0	0	0
1	56	0	-	2014-09-24	2014-10-03	9		38.4	132	132	24	120	58	7		0	1	0	0	0	0	0	0	0	0	1		0	1		0	1	2	0	0	0	0	0	0	1	0	0	0	0	0	0	0	0
[truncated: 98 more columns]
